# Supplementary material for: Synthesis and antibiofilm activity of 1,2,3-triazole-pyridine hybrids against methicillin-resistant Staphylococcus aureus (MRSA)
Source: Royal Society of Chemistry journal article supplement (doi:10.1039/d1nj00773d), 2021-01-01
Supplement: d1nj00773d1.pdf [file d1nj00773d1.pdf]

## Synthesis and antibiofilm activity of 1,2,3-triazole-pyridine hybrids against methicillin-resistant *Staphylococcus aureus* (MRSA)

Tamer El Malah,<sup>a\*</sup> Hanan A. Soliman,<sup>a</sup> Bahaa A. Hemdan,<sup>b</sup> Randa E. Abdel Mageid,<sup>a</sup> and Hany F. Nour<sup>a\*</sup>

<sup>a</sup>Photochemistry Department, Chemical Industries Research Division, National Research Centre, 33 El Buhouth Street, P.O. Box 12622, Cairo, Egypt.

<sup>b</sup>Water Pollution Research Department, Environmental Research Division, National Research Centre, 33 El Buhouth Street, P.O. Box 12622 Cairo, Egypt.

\*Corresponding authors: [tmara\\_nrc3000@yahoo.com](mailto:tmara_nrc3000@yahoo.com) (Tamer El Malah), [hany.nour@daad-alumni.de](mailto:hany.nour@daad-alumni.de) (Hany F. Nour).

## Supporting Information

|                                                                                                                  |           |
|------------------------------------------------------------------------------------------------------------------|-----------|
| <b>Figure S1.</b> $^1\text{H}$ NMR spectrum of compound <b>3</b> (400 MHz, $\text{CDCl}_3$ , 25 °C).....         | <b>4</b>  |
| <b>Figure S2.</b> $^{13}\text{C}$ NMR spectrum of of compound <b>3</b> (100 MHz, $\text{CDCl}_3$ , 25 °C).....   | <b>4</b>  |
| <b>Figure S3.</b> $^1\text{H}$ NMR spectrum of compound <b>4</b> (400 MHz, $\text{CDCl}_3$ , 25 °C).....         | <b>5</b>  |
| <b>Figure S4.</b> $^{13}\text{C}$ NMR spectrum of of compound <b>4</b> (100 MHz, $\text{CDCl}_3$ , 25 °C).....   | <b>5</b>  |
| <b>Figure S5.</b> $^1\text{H}$ NMR spectrum of compound <b>11</b> (400 MHz, $\text{CDCl}_3$ , 25 °C).....        | <b>6</b>  |
| <b>Figure S6.</b> $^{13}\text{C}$ NMR spectrum of of compound <b>11</b> (100 MHz, $\text{CDCl}_3$ , 25 °C).....  | <b>6</b>  |
| <b>Figure S7.</b> $^1\text{H}$ NMR spectrum of compound <b>12</b> (400 MHz, $\text{CDCl}_3$ , 25 °C).....        | <b>7</b>  |
| <b>Figure S8.</b> $^{13}\text{C}$ NMR spectrum of of compound <b>12</b> (100 MHz, $\text{CDCl}_3$ , 25 °C).....  | <b>7</b>  |
| <b>Figure S9.</b> $^1\text{H}$ NMR spectrum of compound <b>13</b> (400 MHz, $\text{CDCl}_3$ , 25 °C).....        | <b>8</b>  |
| <b>Figure S10.</b> $^{13}\text{C}$ NMR spectrum of of compound <b>13</b> (100 MHz, $\text{CDCl}_3$ , 25 °C)..... | <b>8</b>  |
| <b>Figure S11.</b> $^1\text{H}$ NMR spectrum of compound <b>14</b> (400 MHz, $\text{CDCl}_3$ , 25 °C).....       | <b>9</b>  |
| <b>Figure S12.</b> $^{13}\text{C}$ NMR spectrum of of compound <b>14</b> (100 MHz, $\text{CDCl}_3$ , 25 °C)..... | <b>9</b>  |
| <b>Figure S13.</b> $^1\text{H}$ NMR spectrum of compound <b>15</b> (400 MHz, $\text{CDCl}_3$ , 25 °C).....       | <b>10</b> |
| <b>Figure S14.</b> $^{13}\text{C}$ NMR spectrum of of compound <b>15</b> (100 MHz, $\text{CDCl}_3$ , 25 °C)..... | <b>10</b> |
| <b>Figure S15.</b> $^1\text{H}$ NMR spectrum of compound <b>16</b> (400 MHz, $\text{CDCl}_3$ , 25 °C).....       | <b>11</b> |
| <b>Figure S16.</b> $^{13}\text{C}$ NMR spectrum of of compound <b>16</b> (100 MHz, $\text{CDCl}_3$ , 25 °C)..... | <b>11</b> |
| <b>Figure S17.</b> $^1\text{H}$ NMR spectrum of compound <b>17</b> (400 MHz, $\text{CDCl}_3$ , 25 °C).....       | <b>12</b> |
| <b>Figure S18.</b> $^{13}\text{C}$ NMR spectrum of of compound <b>17</b> (100 MHz, $\text{CDCl}_3$ , 25 °C)..... | <b>12</b> |
| <b>Figure S19.</b> $^1\text{H}$ NMR spectrum of compound <b>18</b> (400 MHz, $\text{CDCl}_3$ , 25 °C).....       | <b>13</b> |
| <b>Figure S20.</b> $^{13}\text{C}$ NMR spectrum of of compound <b>18</b> (100 MHz, $\text{CDCl}_3$ , 25 °C)..... | <b>13</b> |
| <b>Figure S21.</b> $^1\text{H}$ NMR spectrum of compound <b>19</b> (400 MHz, $\text{CDCl}_3$ , 25 °C).....       | <b>14</b> |
| <b>Figure S22.</b> $^{13}\text{C}$ NMR spectrum of of compound <b>19</b> (100 MHz, $\text{CDCl}_3$ , 25 °C)..... | <b>14</b> |
| <b>Figure S23.</b> $^1\text{H}$ NMR spectrum of compound <b>20</b> (400 MHz, $\text{CDCl}_3$ , 25 °C).....       | <b>15</b> |
| <b>Figure S24.</b> $^{13}\text{C}$ NMR spectrum of of compound <b>20</b> (100 MHz, $\text{CDCl}_3$ , 25 °C)..... | <b>15</b> |
| <b>Figure S25.</b> $^1\text{H}$ NMR spectrum of compound <b>21</b> (400 MHz, $\text{CDCl}_3$ , 25 °C).....       | <b>16</b> |
| <b>Figure S26.</b> $^{13}\text{C}$ NMR spectrum of of compound <b>21</b> (100 MHz, $\text{CDCl}_3$ , 25 °C)..... | <b>16</b> |
| <b>Figure S27.</b> $^1\text{H}$ NMR spectrum of compound <b>22</b> (400 MHz, $\text{CDCl}_3$ , 25 °C).....       | <b>17</b> |
| <b>Figure S28.</b> $^{13}\text{C}$ NMR spectrum of of compound <b>22</b> (100 MHz, $\text{CDCl}_3$ , 25 °C)..... | <b>17</b> |
| <b>Figure S29.</b> 2D NOESY spectrum of compound <b>4</b> (400 MHz, $\text{CDCl}_3$ , 25 °C).....                | <b>18</b> |

|                                                                                                                |           |
|----------------------------------------------------------------------------------------------------------------|-----------|
| <b>Figure S30.</b> 2D COSY spectrum of compound <b>4</b> (400 MHz, CDCl <sub>3</sub> , 25 °C).....             | <b>18</b> |
| <b>Figure S31.</b> 2D HSQC spectrum of compound <b>4</b> (400 MHz, CDCl <sub>3</sub> , 25 °C).....             | <b>19</b> |
| <b>Figure S32.</b> 2D HMBC spectrum of compound <b>4</b> (400 MHz, CDCl <sub>3</sub> , 25 °C).....             | <b>19</b> |
| <b>Figure S33.</b> 2D COSY spectrum of compound <b>19</b> (400 MHz, CDCl <sub>3</sub> , 25 °C).....            | <b>20</b> |
| <b>Figure S34.</b> 2D HSQC spectrum of compound <b>19</b> (400 MHz, CDCl <sub>3</sub> , 25 °C).....            | <b>20</b> |
| <b>Figure S35.</b> 2D HMBC spectrum of compound <b>19</b> (400 MHz, CDCl <sub>3</sub> , 25 °C).....            | <b>21</b> |
| <b>Figure S36.</b> FT-IR spectrum of compound <b>3</b> .....                                                   | <b>21</b> |
| <b>Figure S37.</b> FT-IR spectrum of compound <b>4</b> .....                                                   | <b>22</b> |
| <b>Figure S38.</b> FT-IR spectrum of compound <b>11</b> .....                                                  | <b>22</b> |
| <b>Figure S39.</b> FT-IR spectrum of compound <b>12</b> .....                                                  | <b>23</b> |
| <b>Figure S40.</b> FT-IR spectrum of compound <b>13</b> .....                                                  | <b>23</b> |
| <b>Figure S41.</b> FT-IR spectrum of compound <b>14</b> .....                                                  | <b>24</b> |
| <b>Figure S42.</b> FT-IR spectrum of compound <b>15</b> .....                                                  | <b>24</b> |
| <b>Figure S43.</b> FT-IR spectrum of compound <b>16</b> .....                                                  | <b>25</b> |
| <b>Figure S44.</b> FT-IR spectrum of compound <b>17</b> .....                                                  | <b>25</b> |
| <b>Figure S45.</b> FT-IR spectrum of compound <b>18</b> .....                                                  | <b>26</b> |
| <b>Figure S46.</b> FT-IR spectrum of compound <b>19</b> .....                                                  | <b>26</b> |
| <b>Figure S47.</b> FT-IR spectrum of compound <b>20</b> .....                                                  | <b>27</b> |
| <b>Figure S48.</b> FT-IR spectrum of compound <b>21</b> .....                                                  | <b>27</b> |
| <b>Figure S49.</b> FT-IR spectrum of compound <b>22</b> .....                                                  | <b>28</b> |
| <b>Figure S50.</b> Normalised absorbance (%) of compounds <b>11-22</b> against planktonic and sessile MRSA.... | <b>29</b> |
| <b>Table S1.</b> 2D NMR correlations measured for compound <b>4</b> .....                                      | <b>30</b> |
| <b>Table S2.</b> 2D NMR correlations measured for compound <b>19</b> .....                                     | <b>30</b> |
| <b>Table S1.</b> Microtox effective concentration levels of toxicity.....                                      | <b>30</b> |

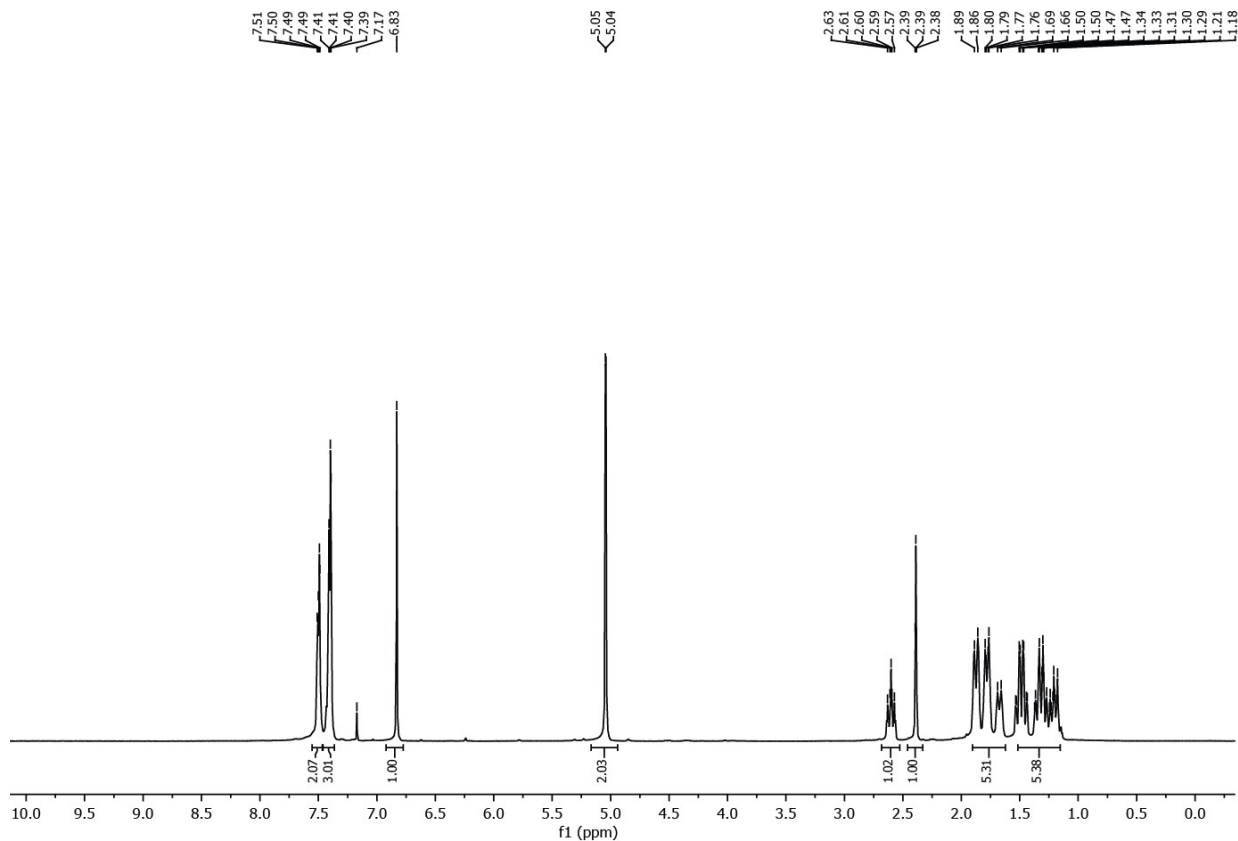

**Figure S1.**  $^1\text{H}$  NMR spectrum of compound **3** (400 MHz,  $\text{CDCl}_3$ , 25  $^\circ\text{C}$ ).

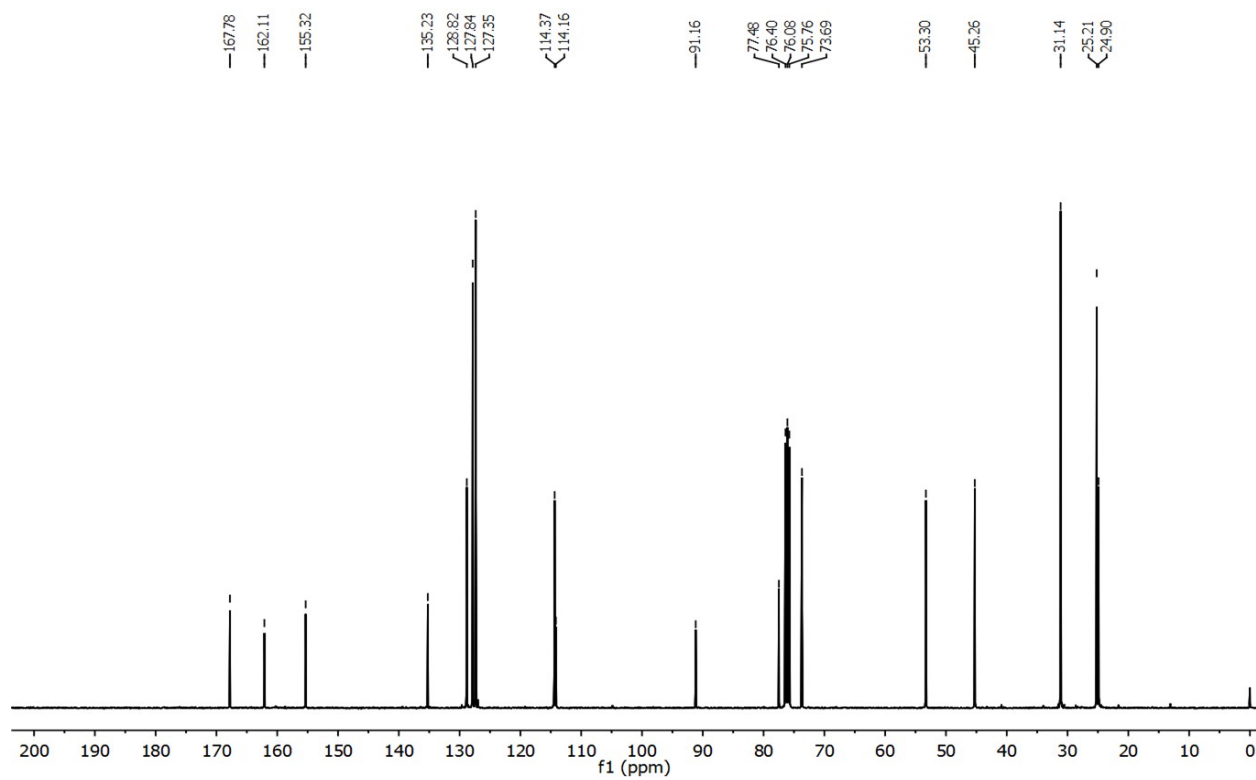

**Figure S2.**  $^{13}\text{C}$  NMR spectrum of compound **3** (100 MHz,  $\text{CDCl}_3$ , 25  $^\circ\text{C}$ ).

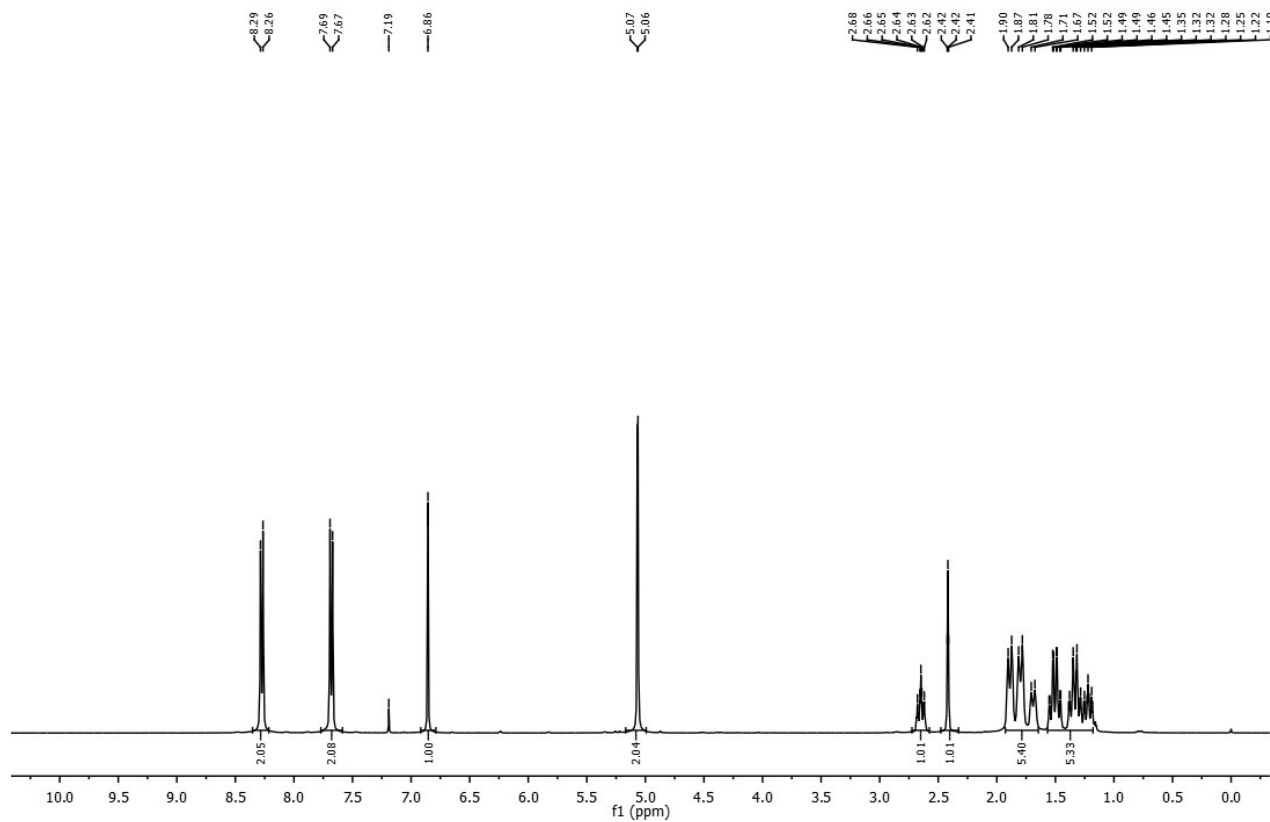

**Figure S3.**  $^1\text{H}$  NMR spectrum of compound **4** (400 MHz,  $\text{CDCl}_3$ , 25  $^\circ\text{C}$ ).

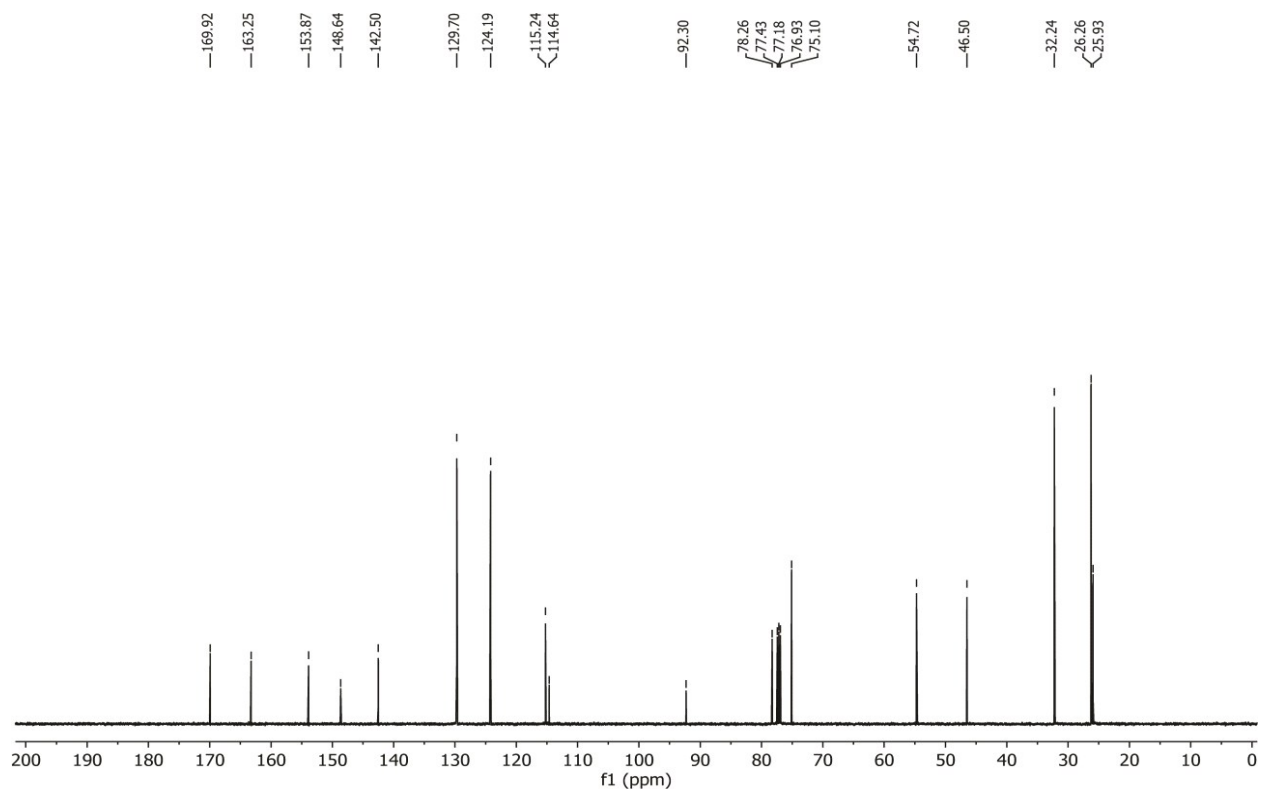

**Figure S4.**  $^{13}\text{C}$  NMR spectrum of compound **4** (100 MHz,  $\text{CDCl}_3$ , 25  $^\circ\text{C}$ ).

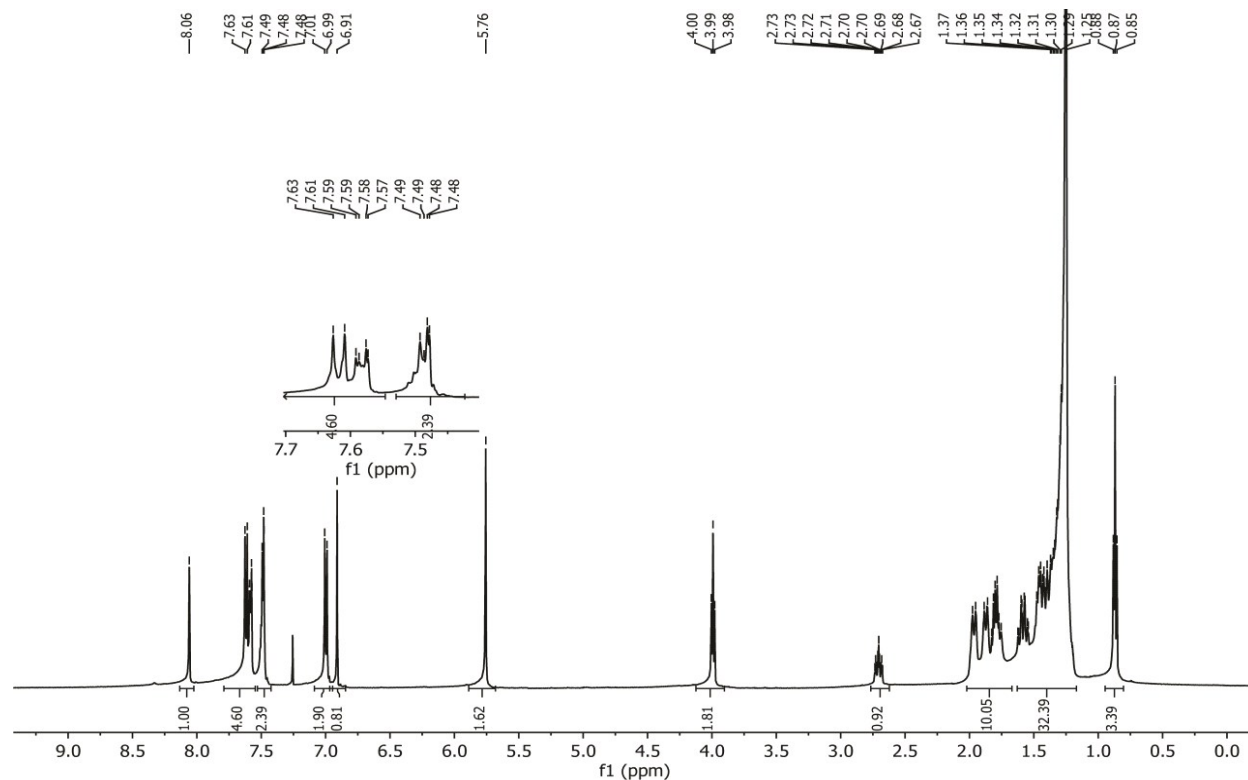

Figure S5.  $^1\text{H}$  NMR spectrum of compound **11** (400 MHz,  $\text{CDCl}_3$ , 25 °C).

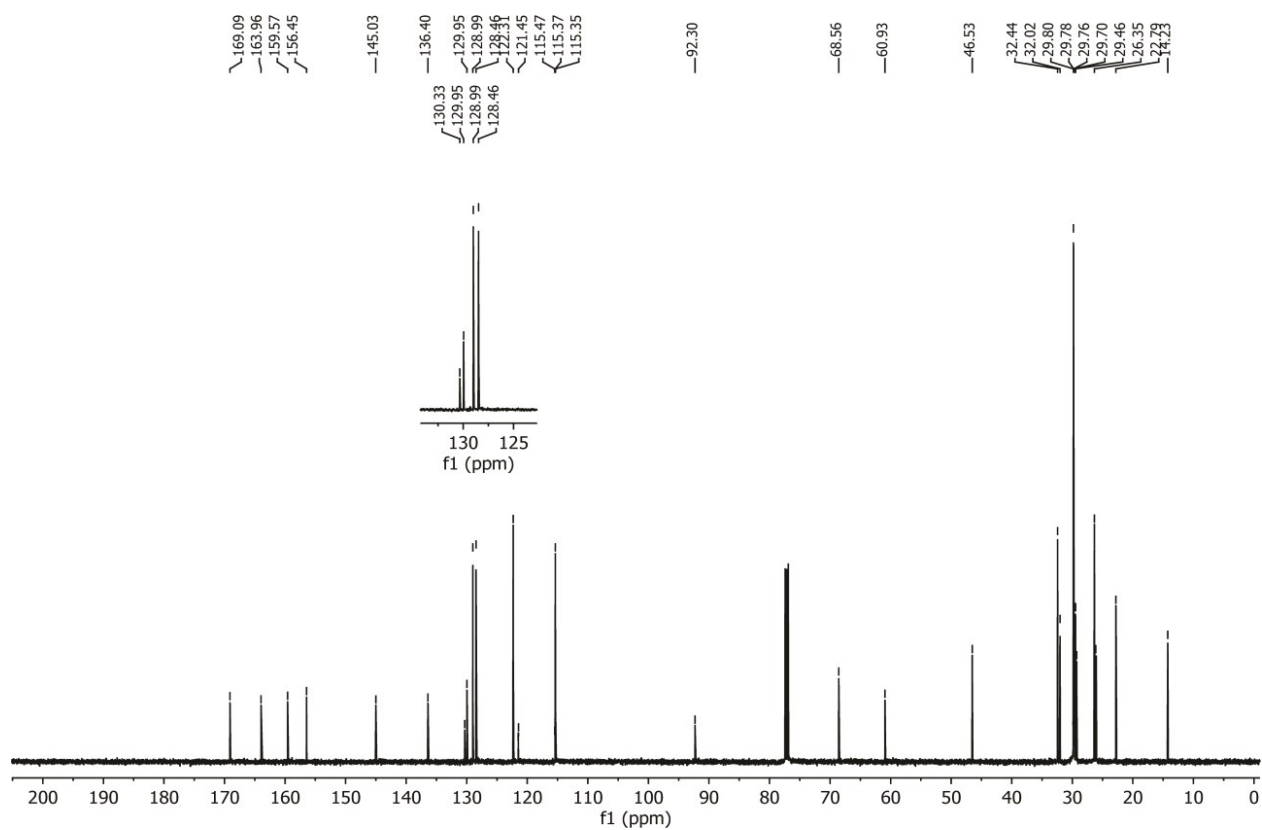

Figure S6.  $^{13}\text{C}$  NMR spectrum of of compound **11** (100 MHz,  $\text{CDCl}_3$ , 25 °C).



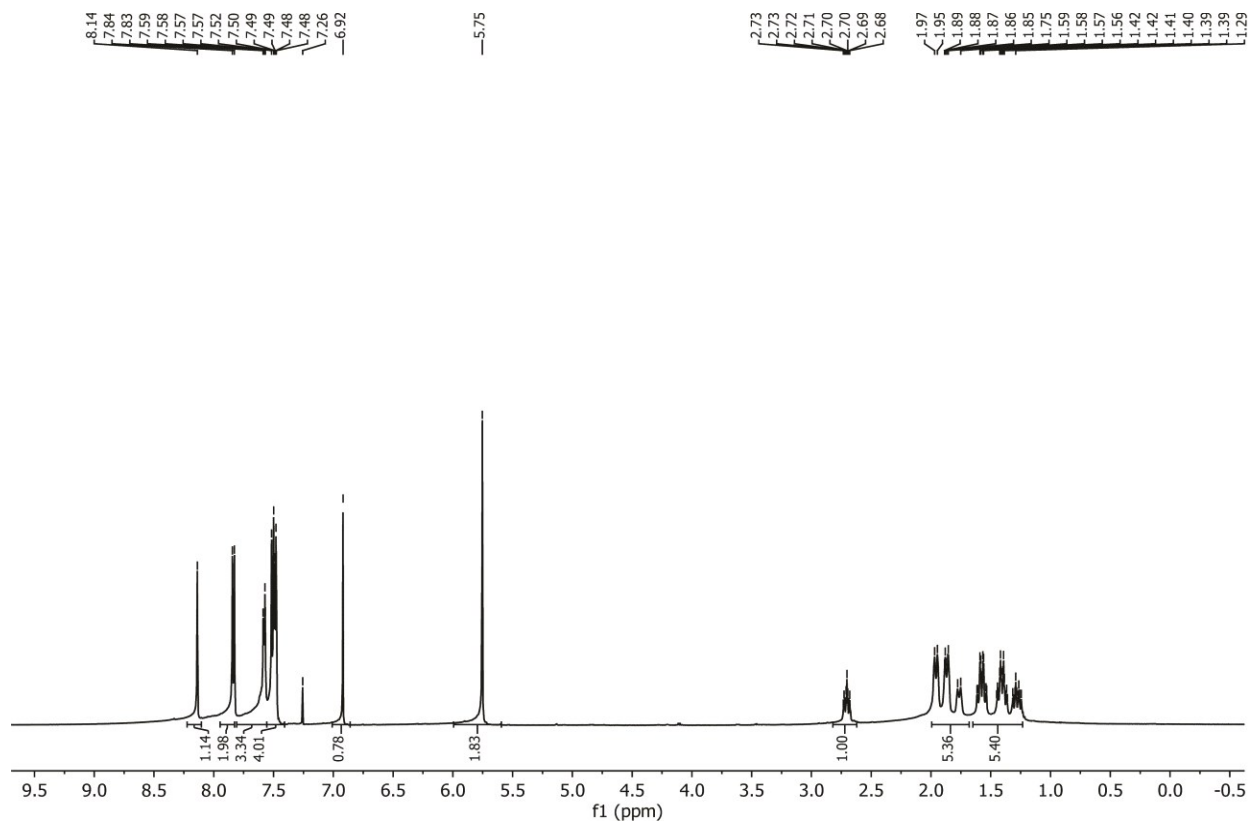

**Figure S9.**  $^1\text{H}$  NMR spectrum of compound **13** (400 MHz,  $\text{CDCl}_3$ , 25  $^\circ\text{C}$ ).

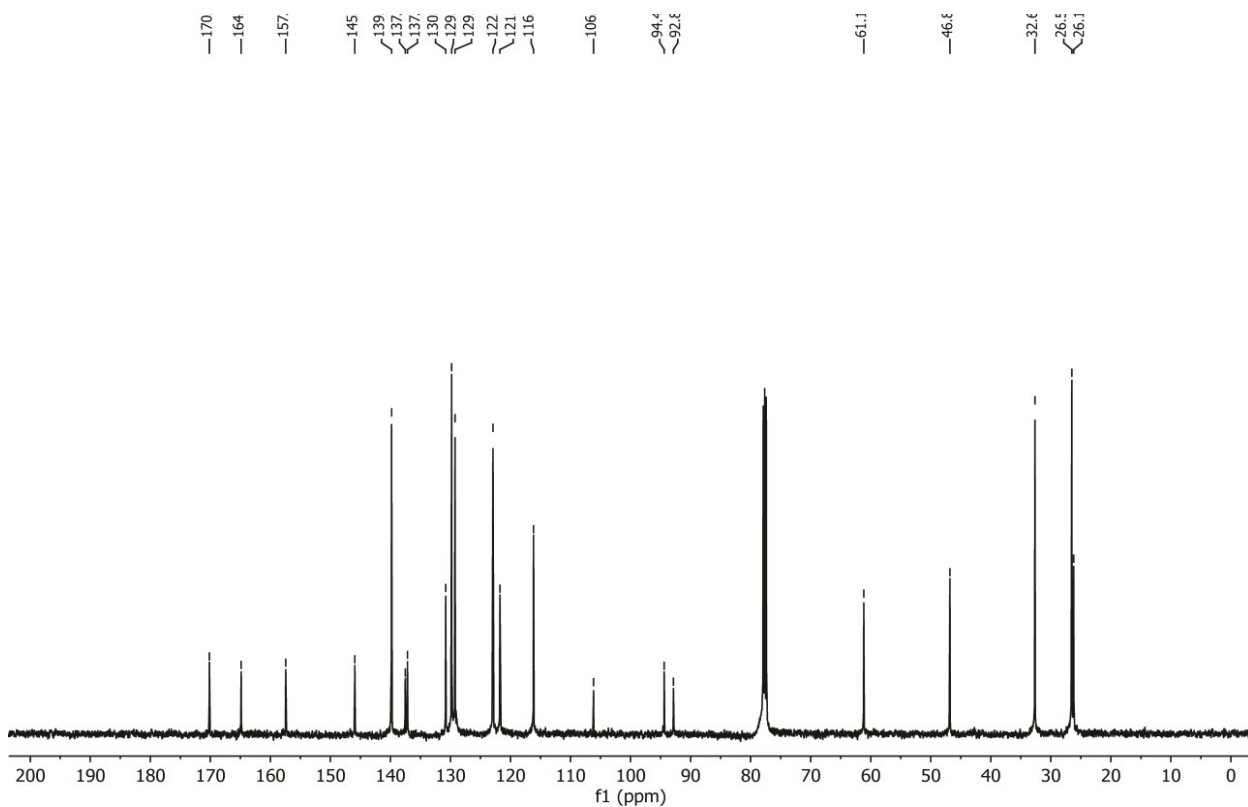

**Figure S10.**  $^{13}\text{C}$  NMR spectrum of of compound **13** (100 MHz,  $\text{CDCl}_3$ , 25  $^\circ\text{C}$ ).



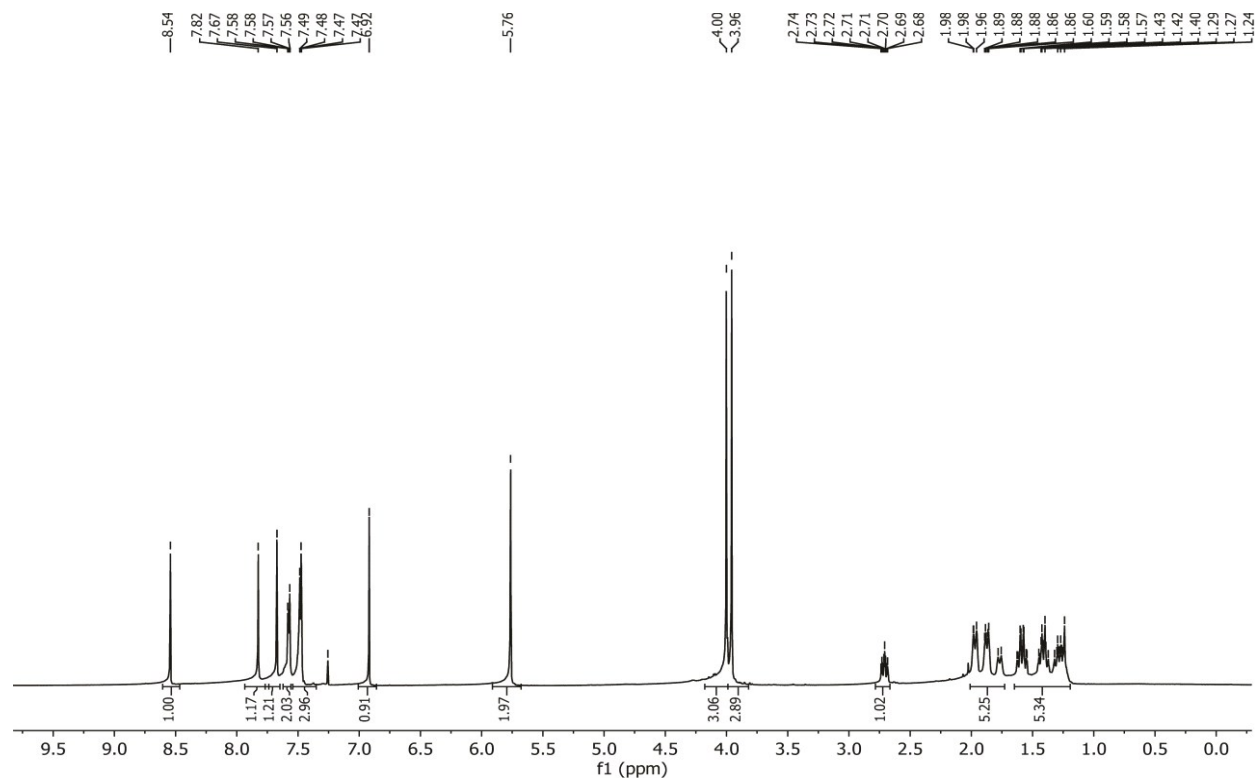

**Figure S11.**  $^1\text{H}$  NMR spectrum of compound **14** (400 MHz,  $\text{CDCl}_3$ , 25  $^\circ\text{C}$ ).

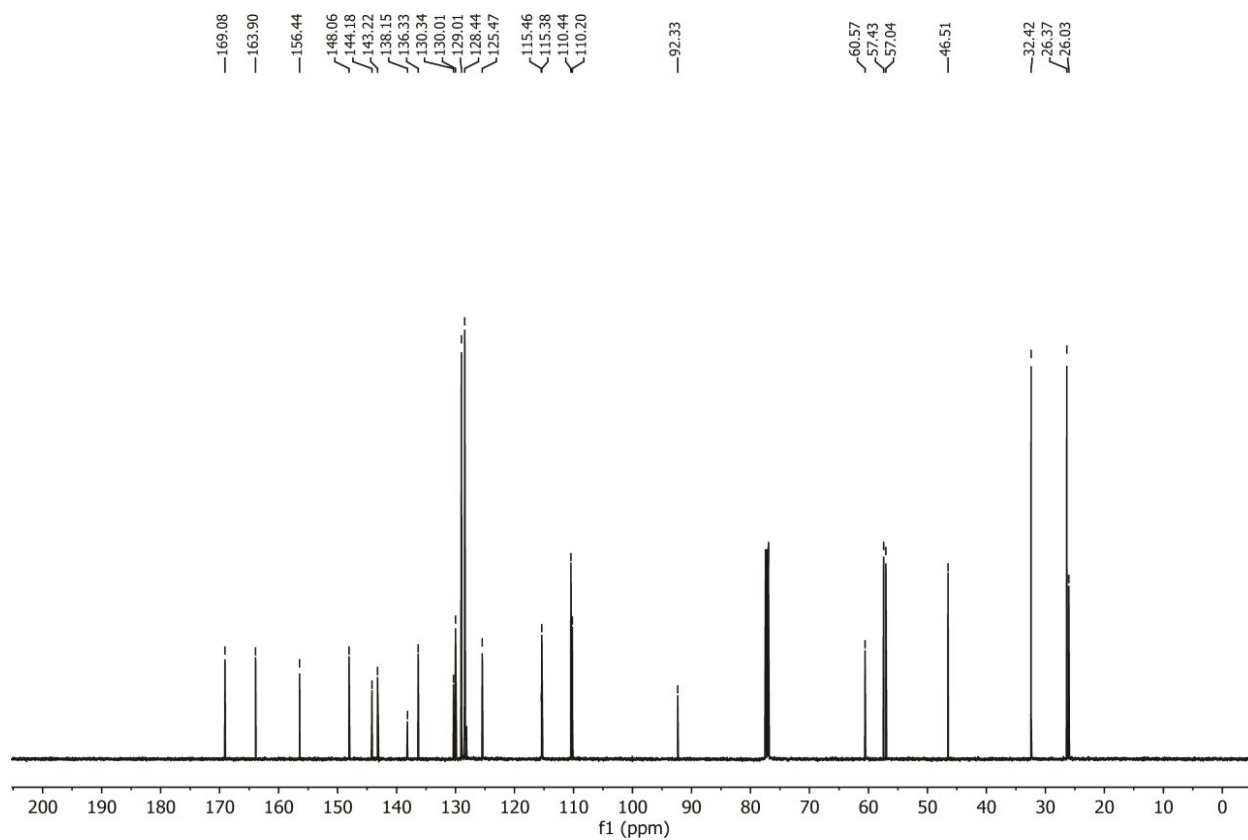

**Figure S12.**  $^{13}\text{C}$  NMR spectrum of of compound **14** (100 MHz,  $\text{CDCl}_3$ , 25  $^\circ\text{C}$ ).

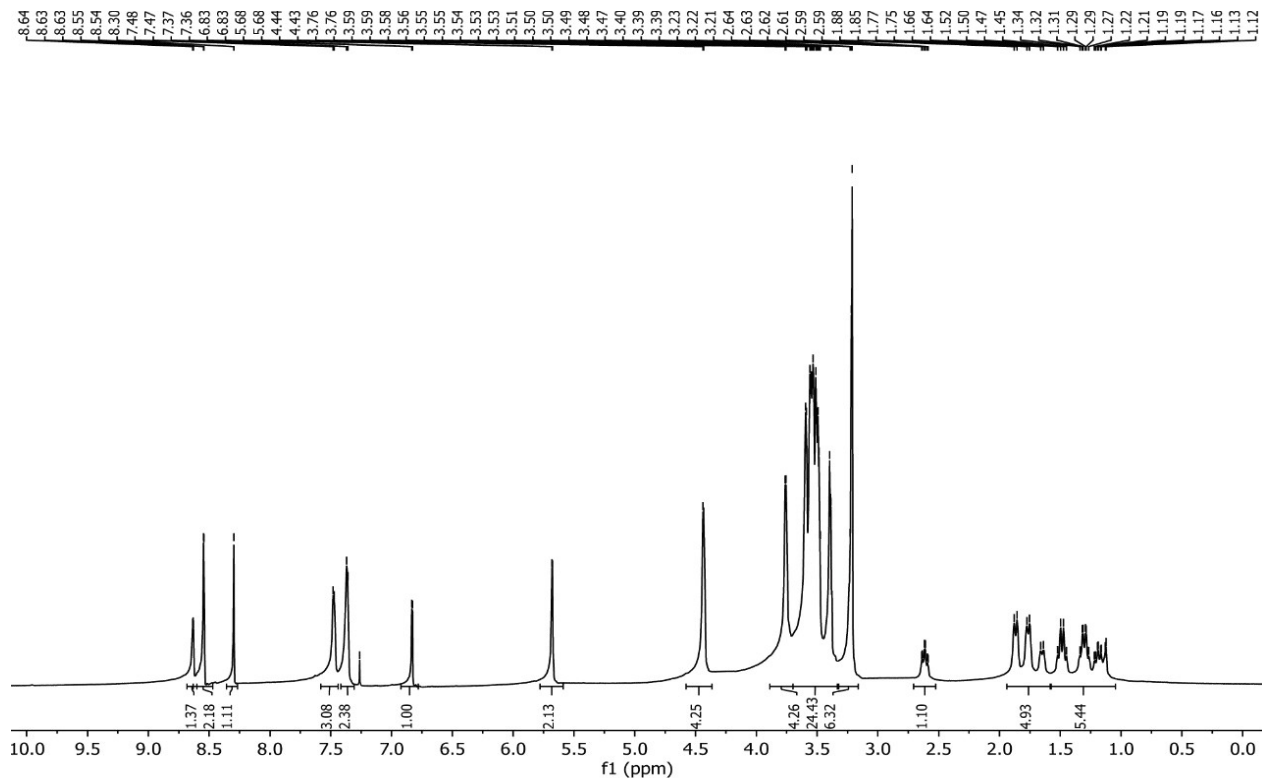

Figure S13.  $^1\text{H}$  NMR spectrum of compound **15** (400 MHz,  $\text{CDCl}_3$ , 25  $^\circ\text{C}$ ).

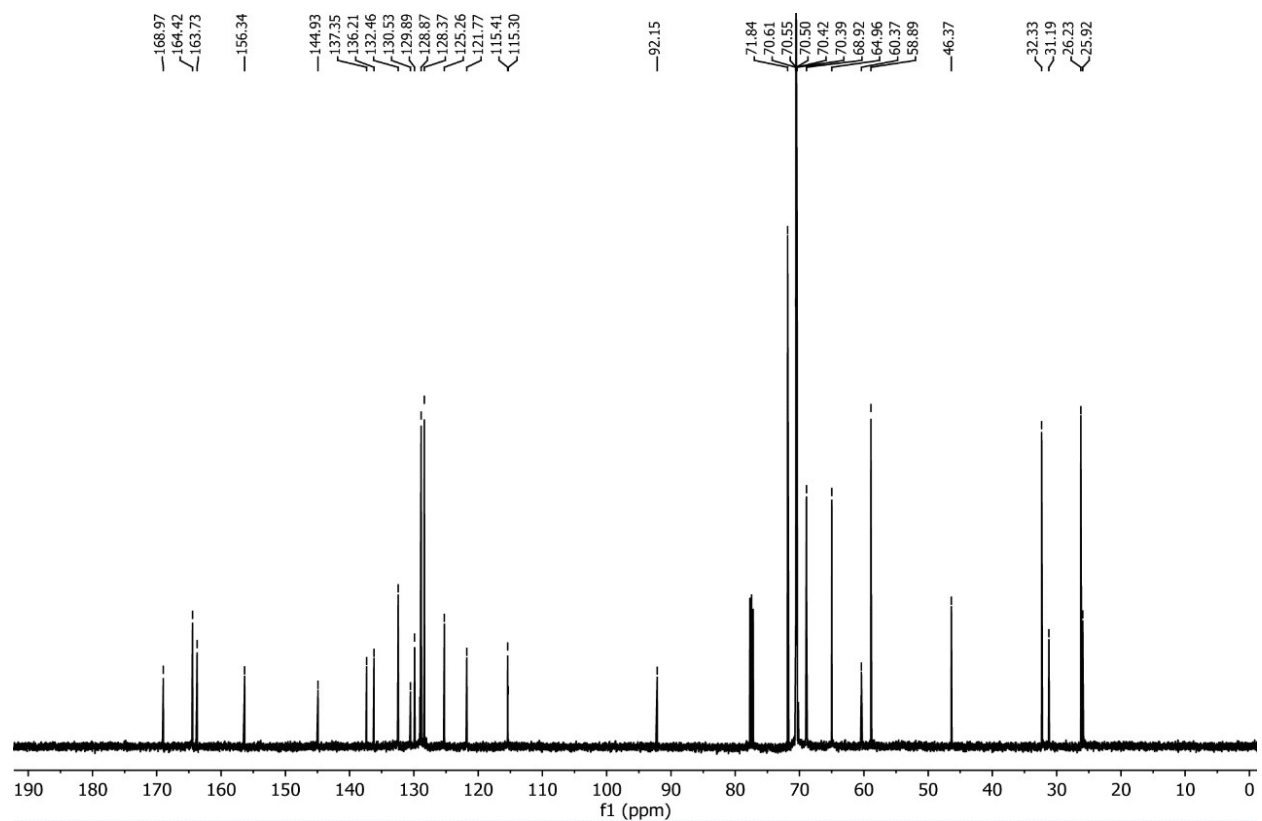

Figure S14.  $^{13}\text{C}$  NMR spectrum of compound **15** (100 MHz,  $\text{CDCl}_3$ , 25  $^\circ\text{C}$ ).

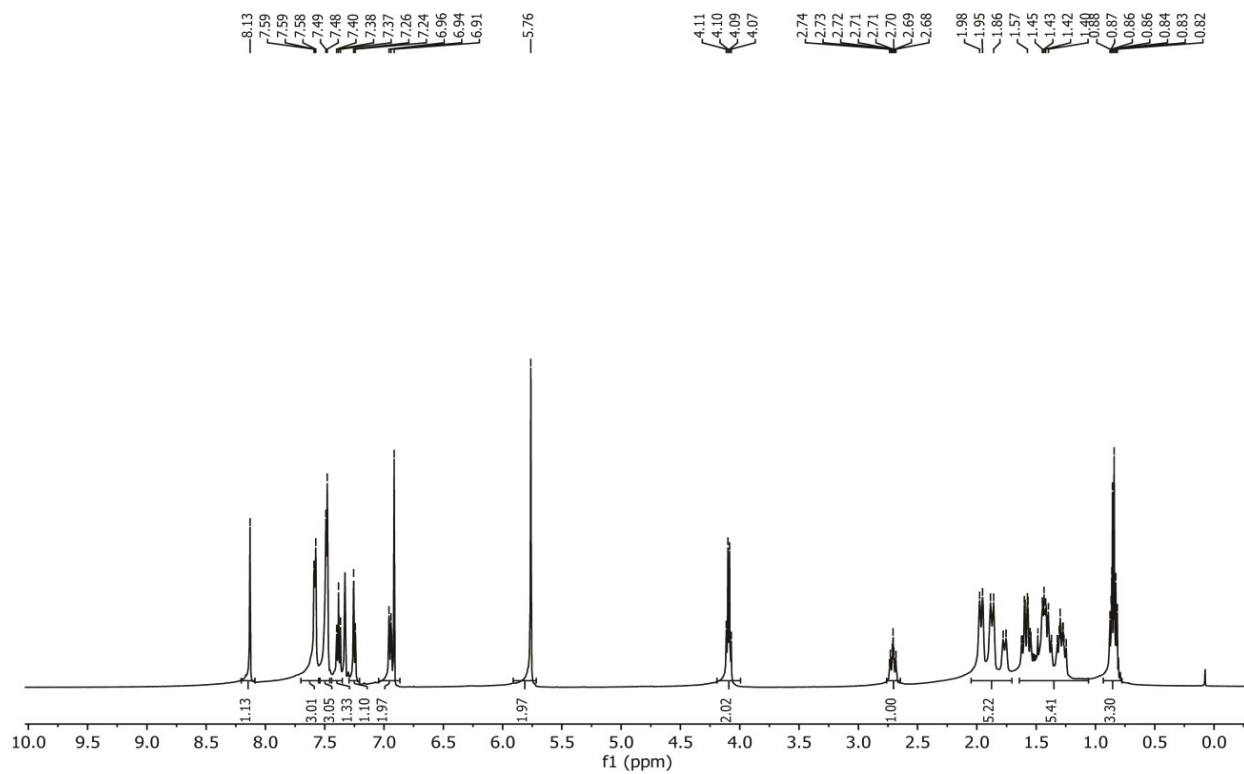

**Figure S15.**  $^1\text{H}$  NMR spectrum of compound **16** (400 MHz,  $\text{CDCl}_3$ , 25  $^\circ\text{C}$ ).

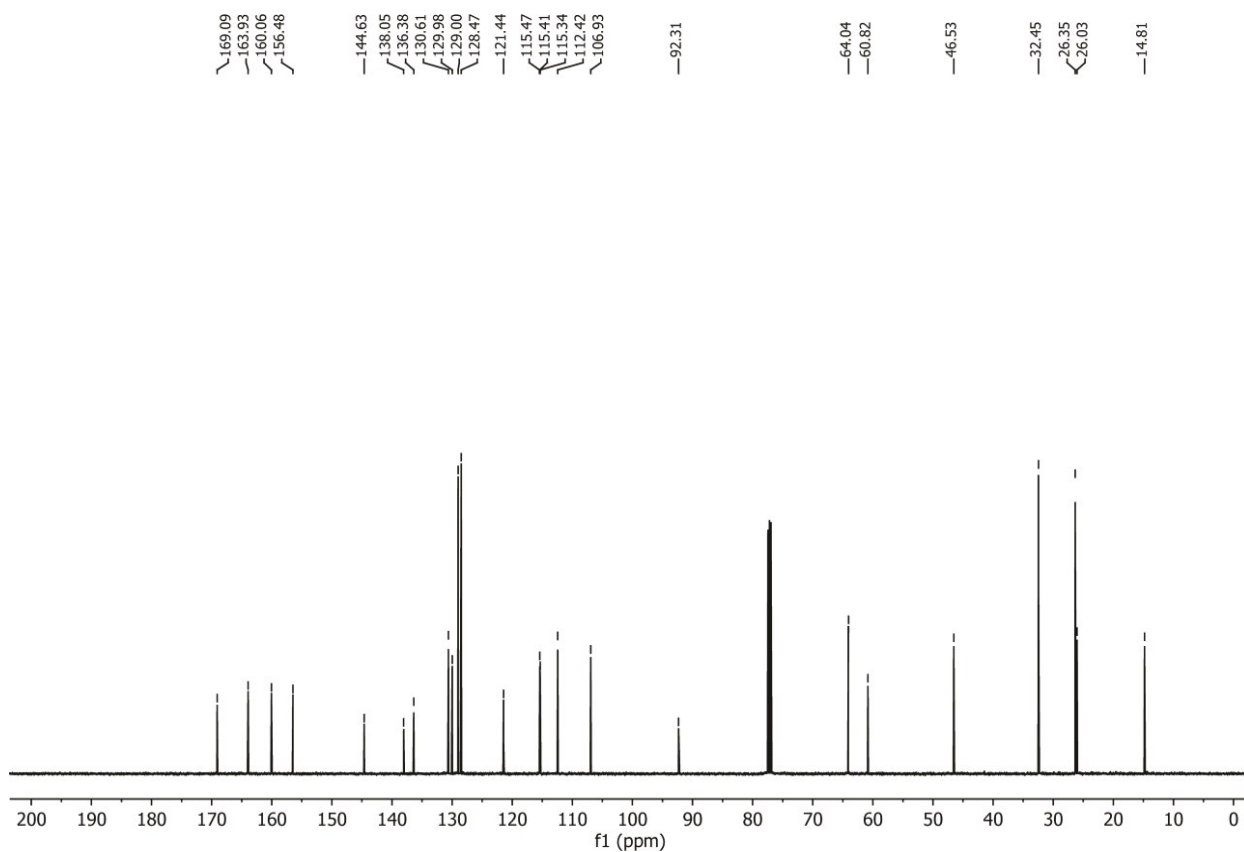

**Figure S16.**  $^{13}\text{C}$  NMR spectrum of of compound **16** (100 MHz,  $\text{CDCl}_3$ , 25  $^\circ\text{C}$ ).

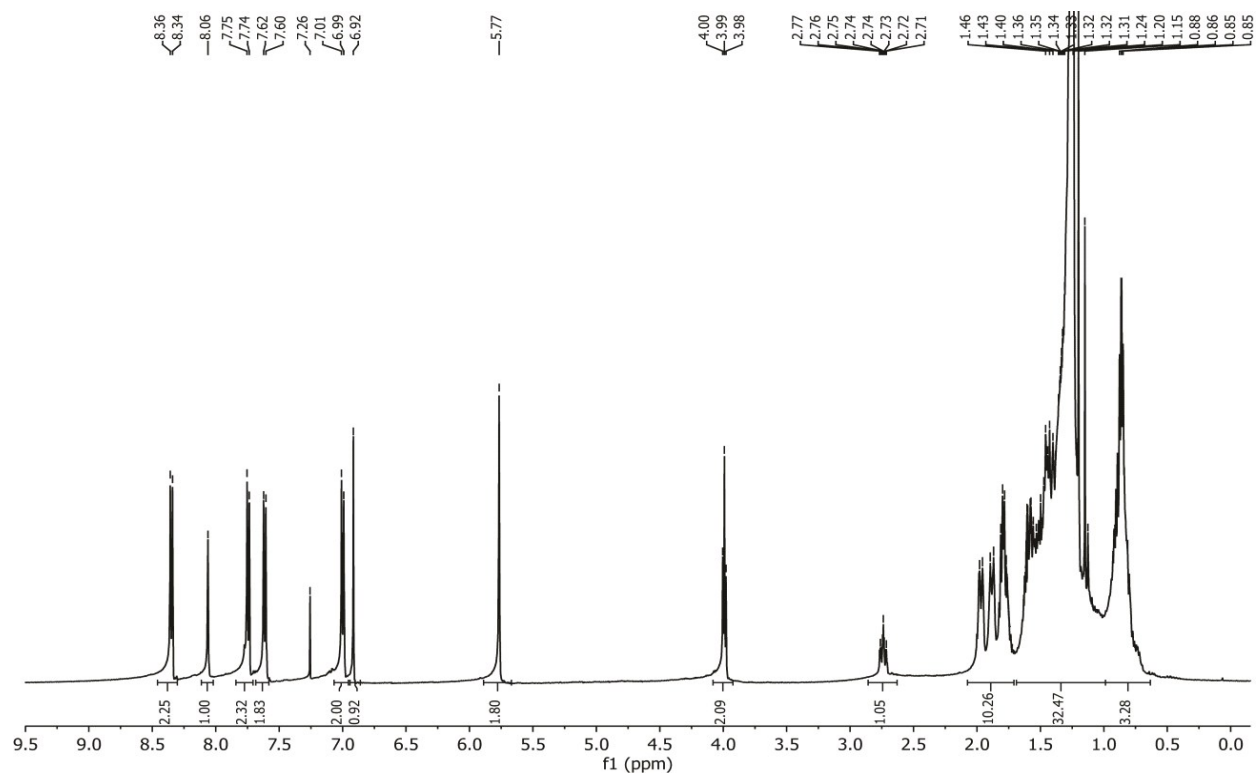

**Figure S17.**  $^1\text{H}$  NMR spectrum of compound **17** (400 MHz,  $\text{CDCl}_3$ , 25  $^\circ\text{C}$ ).

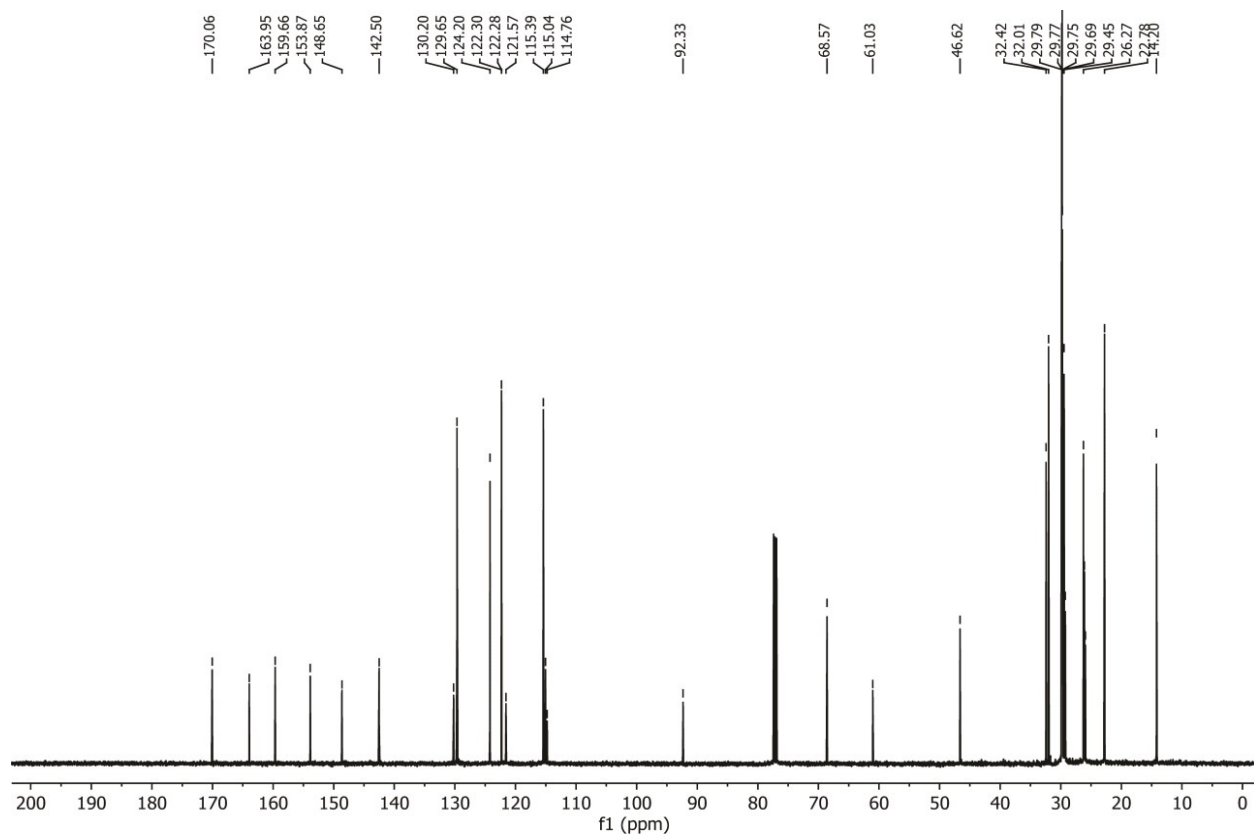

**Figure S18.**  $^{13}\text{C}$  NMR spectrum of of compound **17** (100 MHz,  $\text{CDCl}_3$ , 25  $^\circ\text{C}$ ).

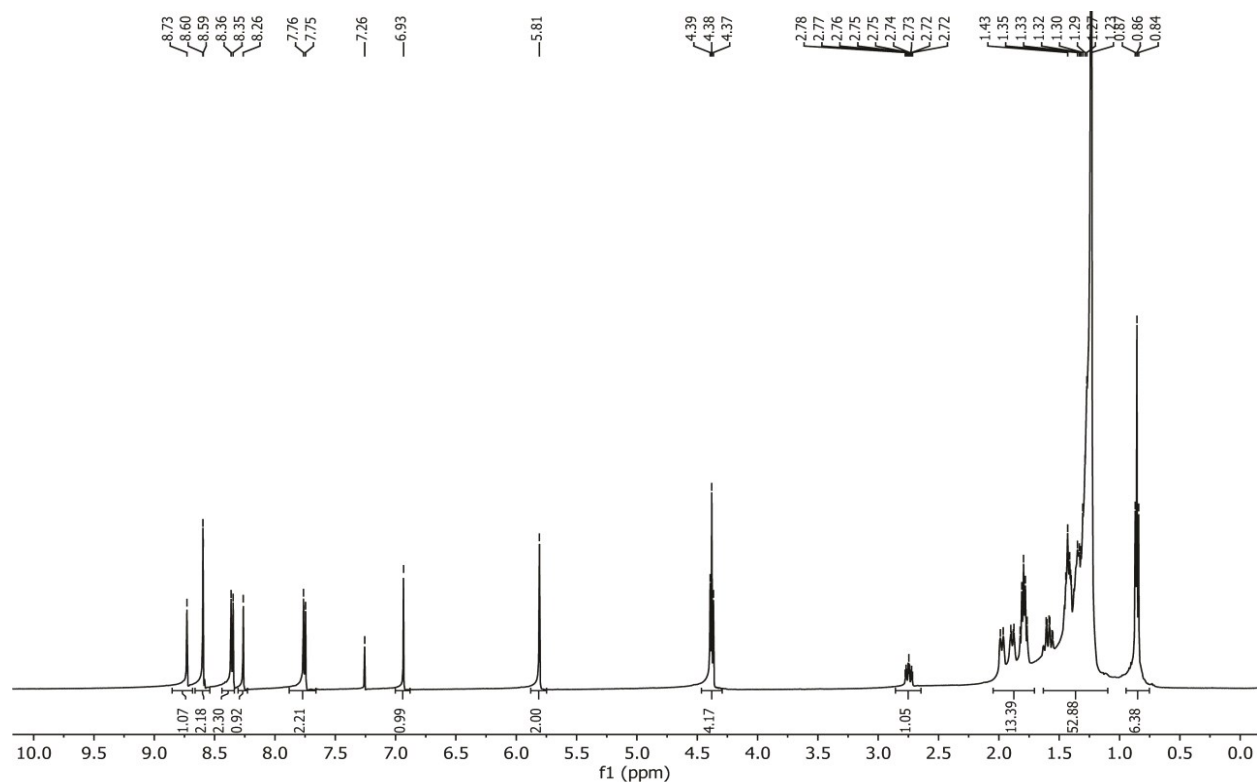

Figure S19.  $^1\text{H}$  NMR spectrum of compound **18** (400 MHz,  $\text{CDCl}_3$ , 25  $^\circ\text{C}$ ).

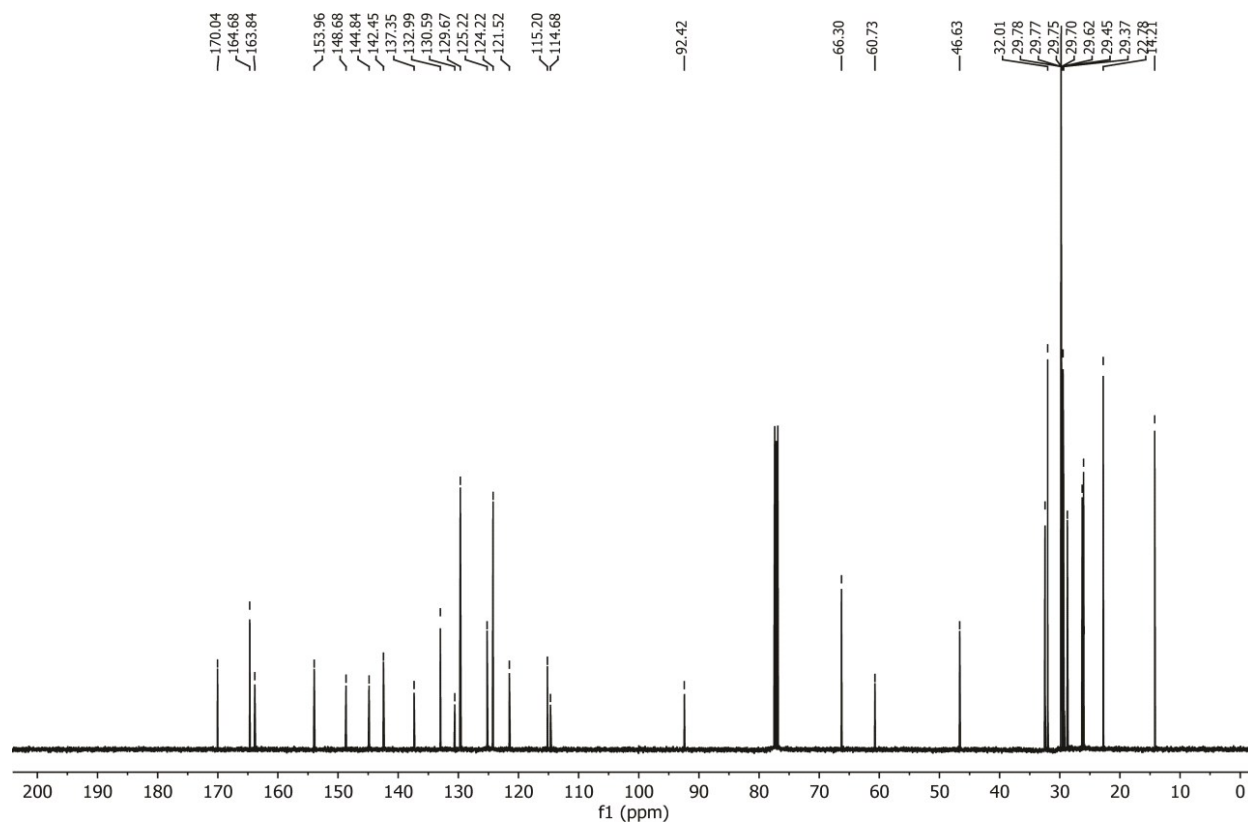

Figure S20.  $^{13}\text{C}$  NMR spectrum of of compound **18** (100 MHz,  $\text{CDCl}_3$ , 25  $^\circ\text{C}$ ).

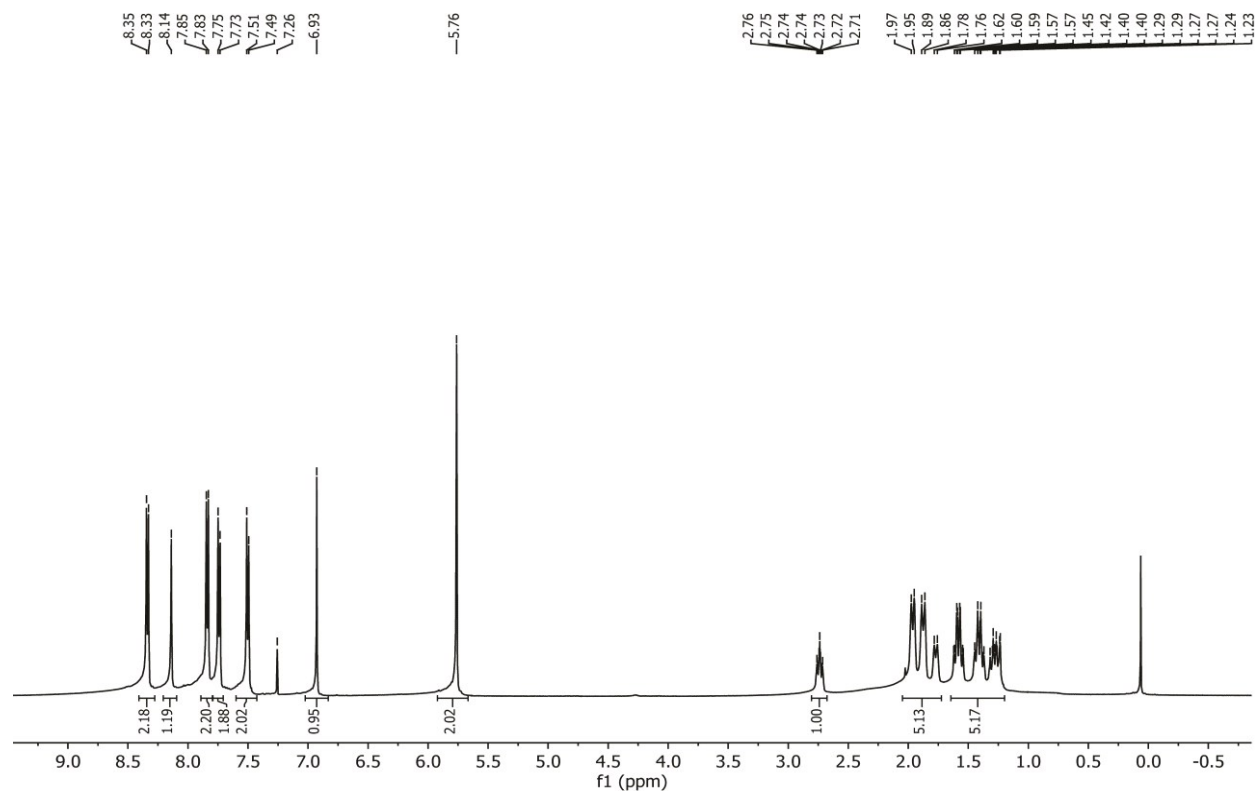

**Figure S21.**  $^1\text{H}$  NMR spectrum of compound **19** (400 MHz,  $\text{CDCl}_3$ , 25  $^\circ\text{C}$ ).

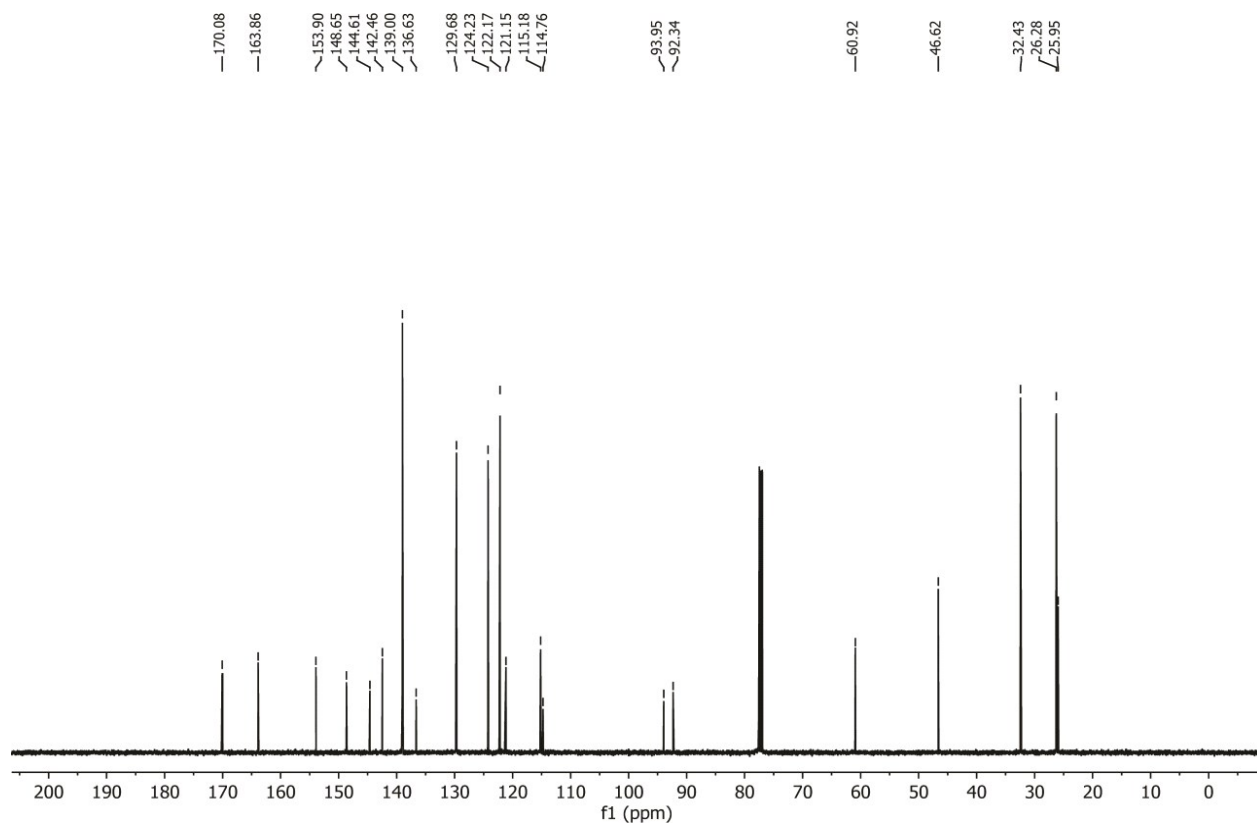

**Figure S22.**  $^{13}\text{C}$  NMR spectrum of of compound **19** (100 MHz,  $\text{CDCl}_3$ , 25  $^\circ\text{C}$ ).

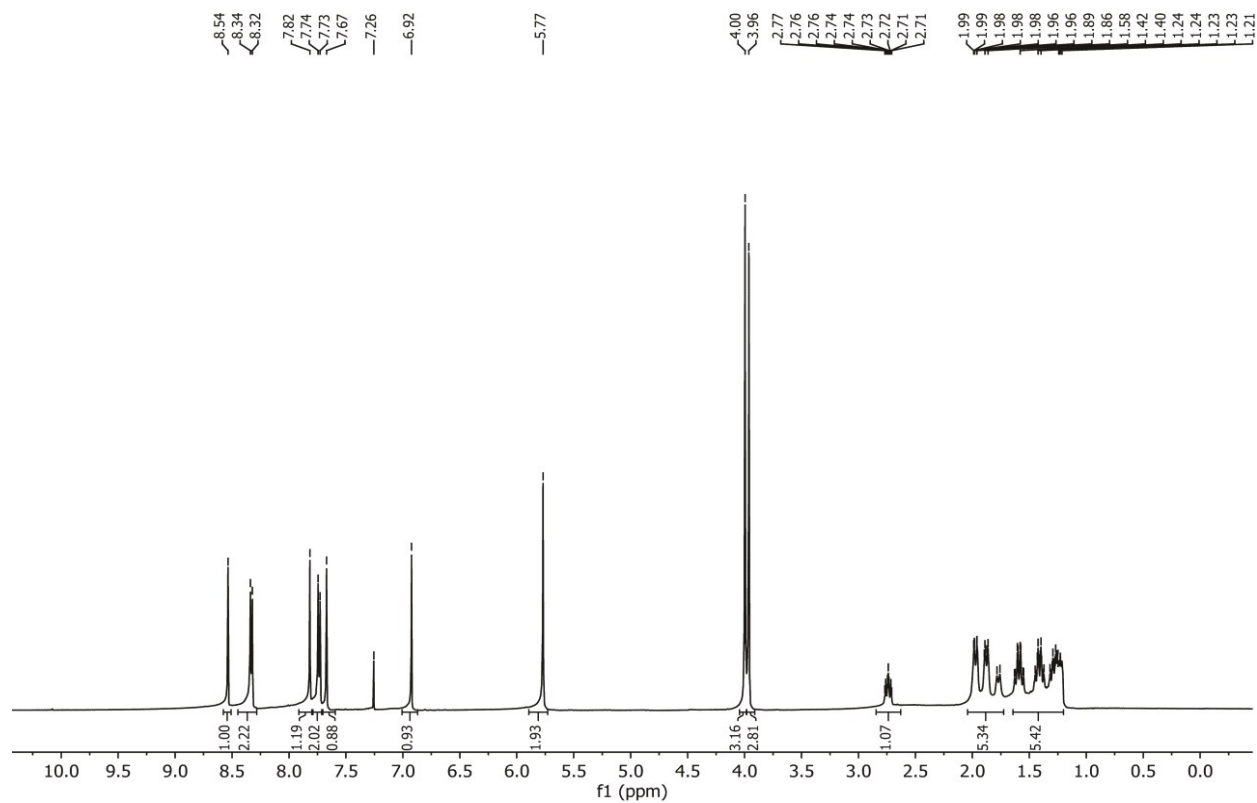

**Figure S23.**  $^1\text{H}$  NMR spectrum of compound **20** (400 MHz,  $\text{CDCl}_3$ , 25  $^\circ\text{C}$ ).

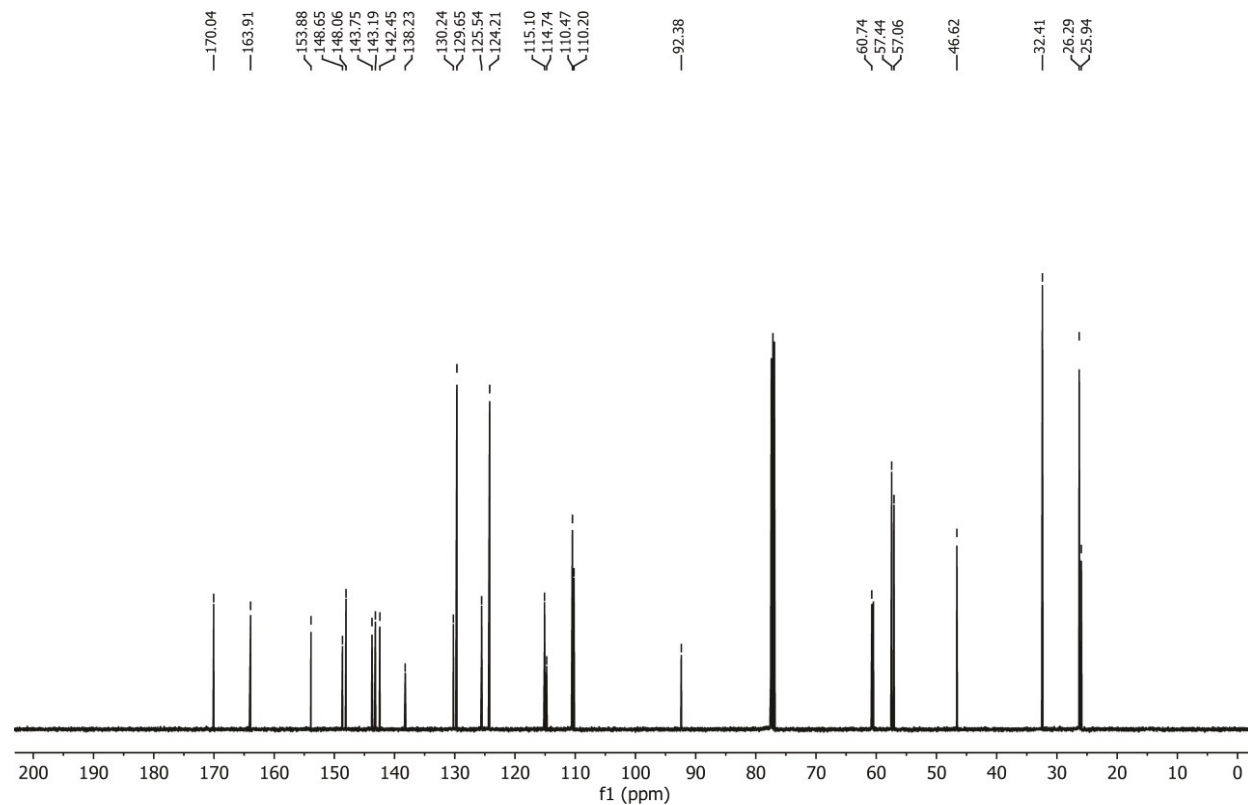

**Figure S24.**  $^{13}\text{C}$  NMR spectrum of of compound **20** (100 MHz,  $\text{CDCl}_3$ , 25  $^\circ\text{C}$ ).

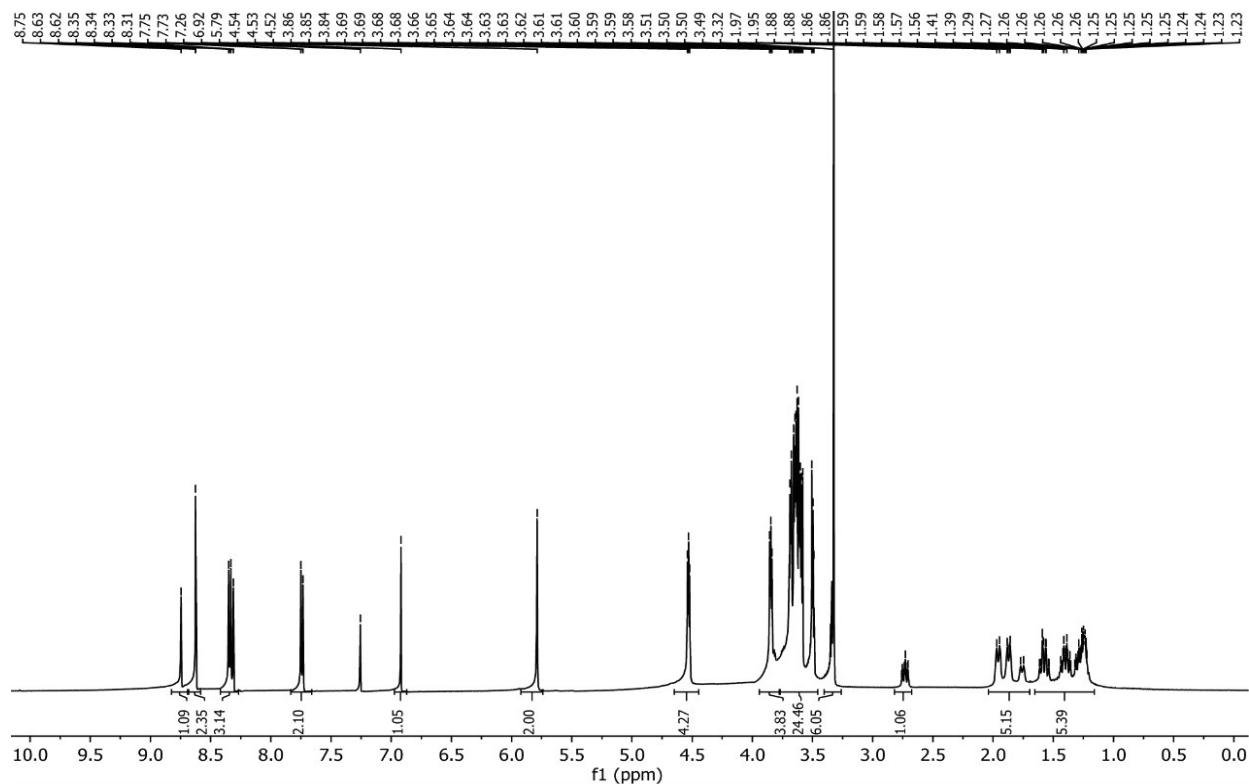

Figure S25.  $^1\text{H}$  NMR spectrum of compound **21** (400 MHz,  $\text{CDCl}_3$ , 25  $^\circ\text{C}$ ).

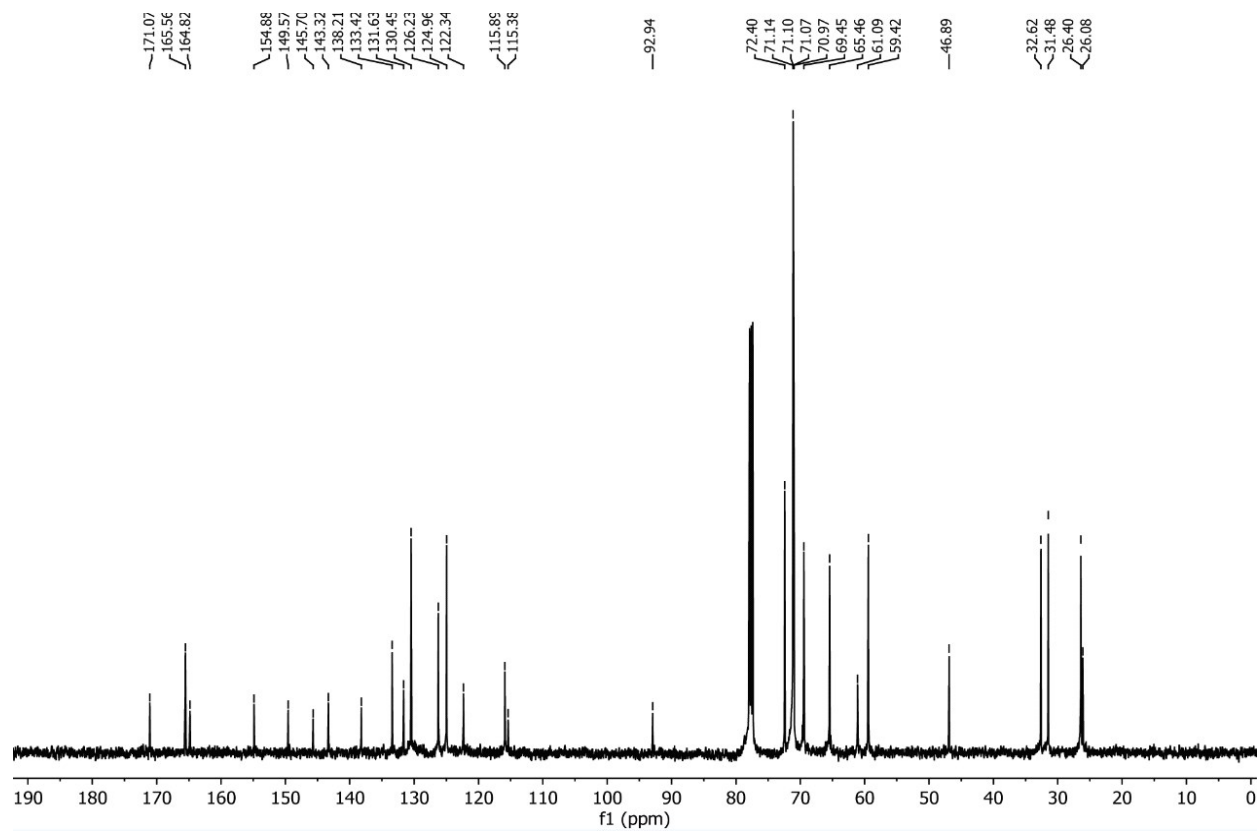

Figure S26.  $^{13}\text{C}$  NMR spectrum of of compound **21** (100 MHz,  $\text{CDCl}_3$ , 25  $^\circ\text{C}$ ).



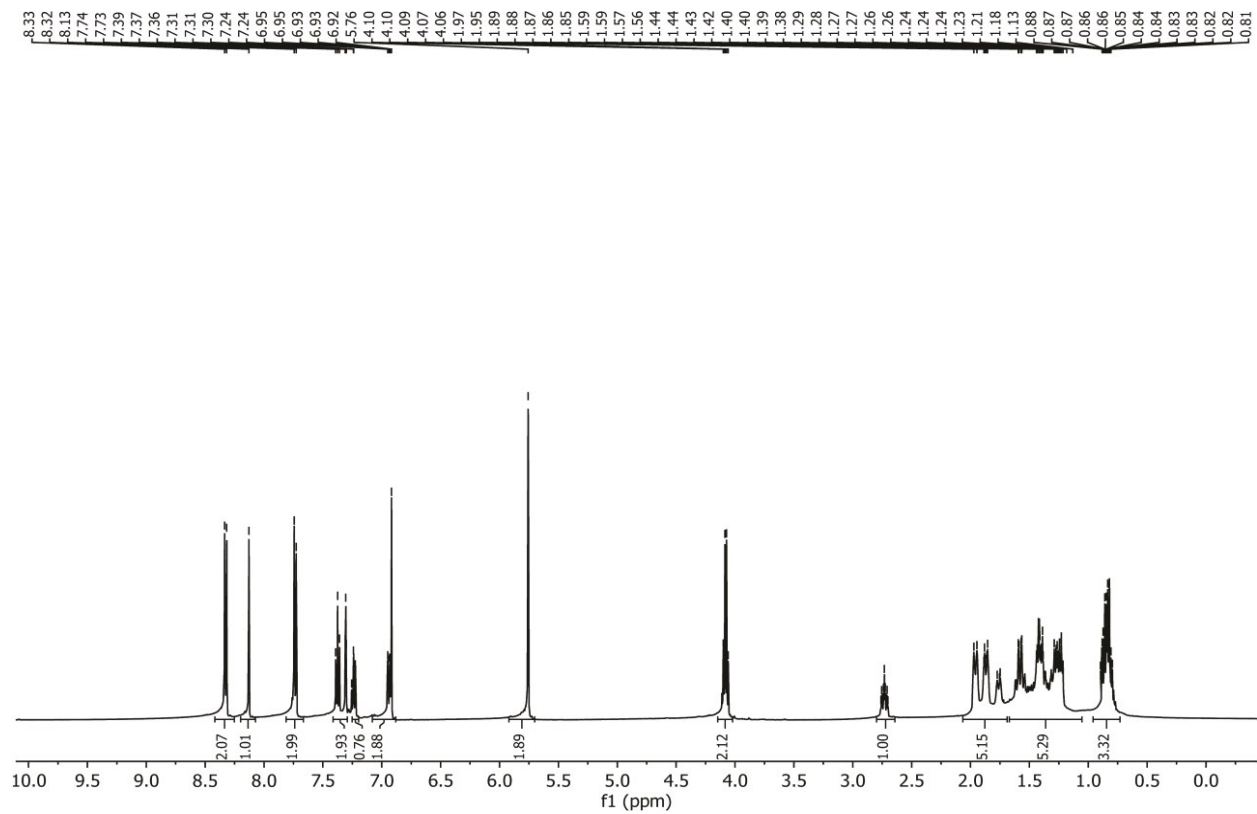

Figure S27.  $^1\text{H}$  NMR spectrum of compound **22** (400 MHz,  $\text{CDCl}_3$ , 25  $^\circ\text{C}$ ).

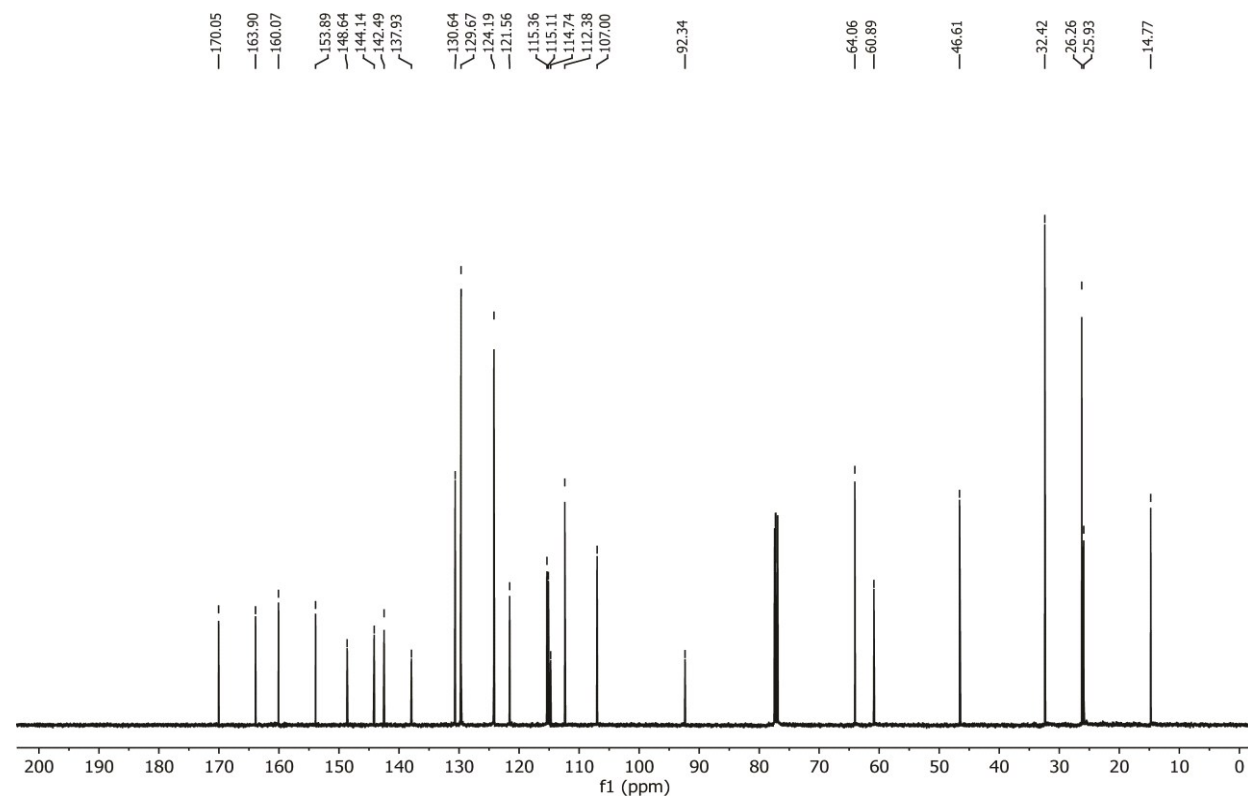

Figure S28.  $^{13}\text{C}$  NMR spectrum of compound **22** (100 MHz,  $\text{CDCl}_3$ , 25  $^\circ\text{C}$ ).

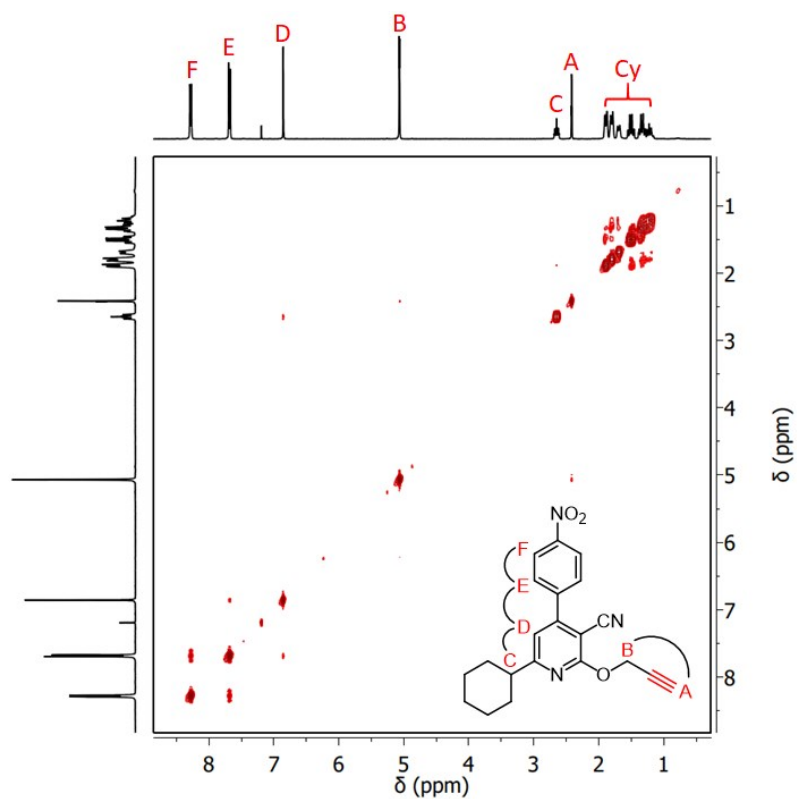

**Figure S29.** 2D NOESY spectrum of compound **4** (400 MHz, CDCl<sub>3</sub>, 25 °C).

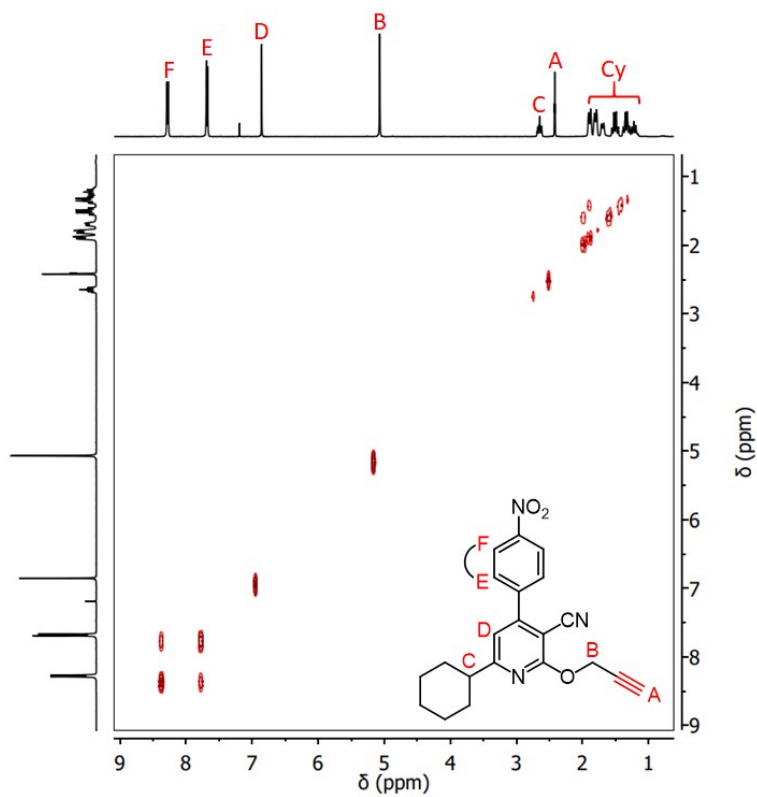

**Figure S30.** 2D COSY spectrum of compound **4** (400 MHz, CDCl<sub>3</sub>, 25 °C).

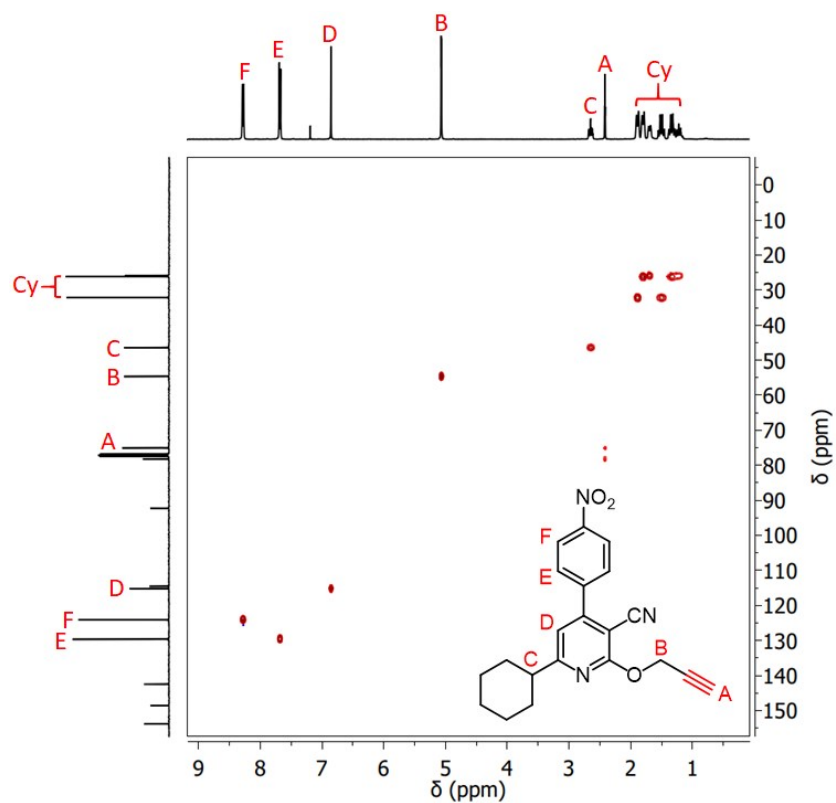

Figure S31. 2D HSQC spectrum of compound **4** (400 MHz, CDCl<sub>3</sub>, 25 °C).

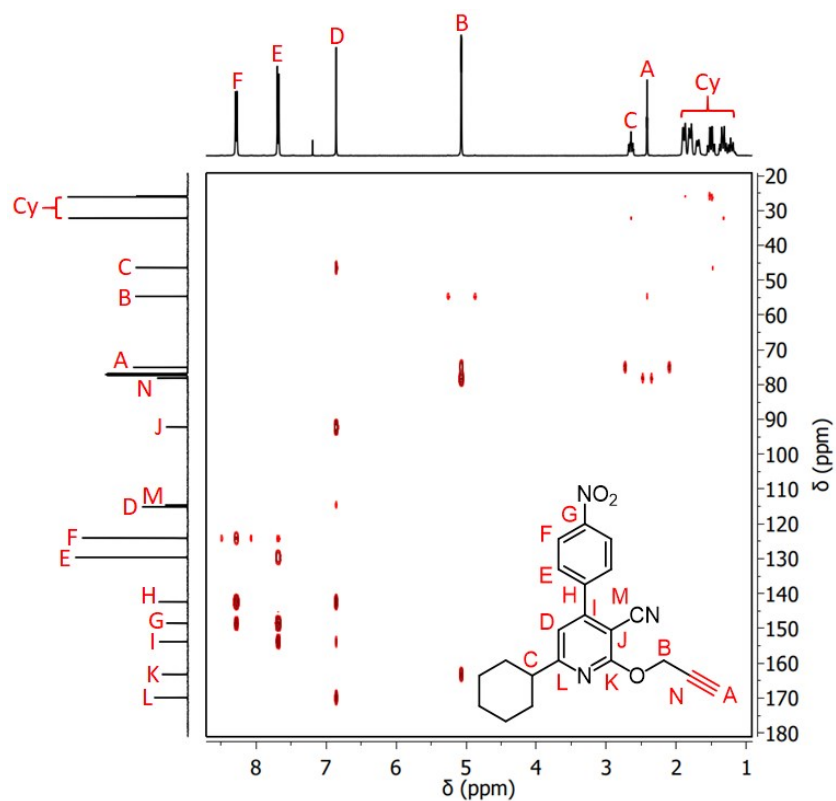

Figure S32. 2D HMBC spectrum of compound **4** (400 MHz, CDCl<sub>3</sub>, 25 °C).

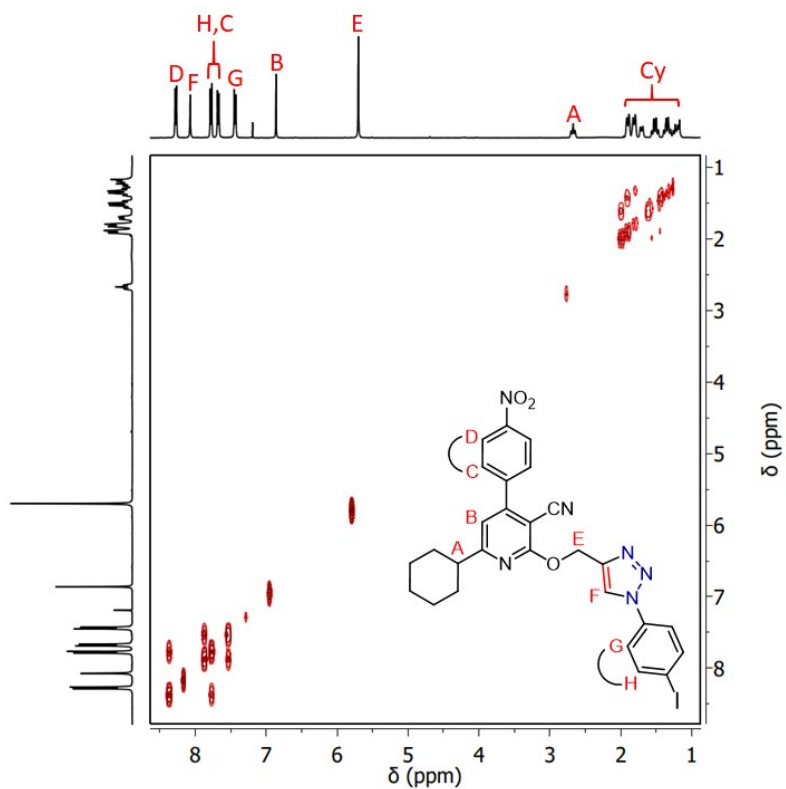

Figure S33. 2D COSY spectrum of compound **19** (400 MHz,  $\text{CDCl}_3$ , 25 °C).

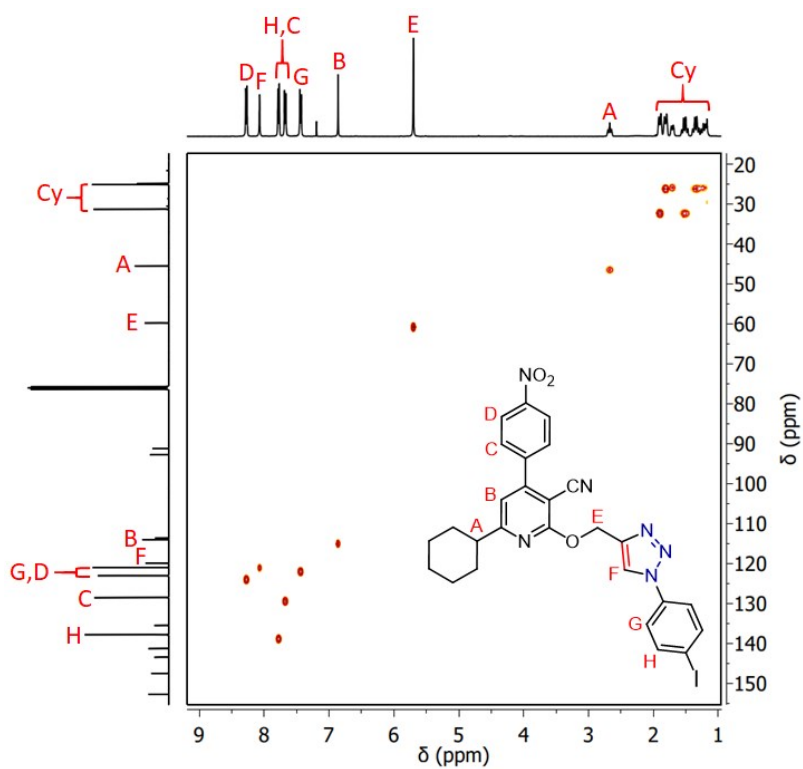

Figure S34. 2D HSQC spectrum of compound **19** (400 MHz,  $\text{CDCl}_3$ , 25 °C).

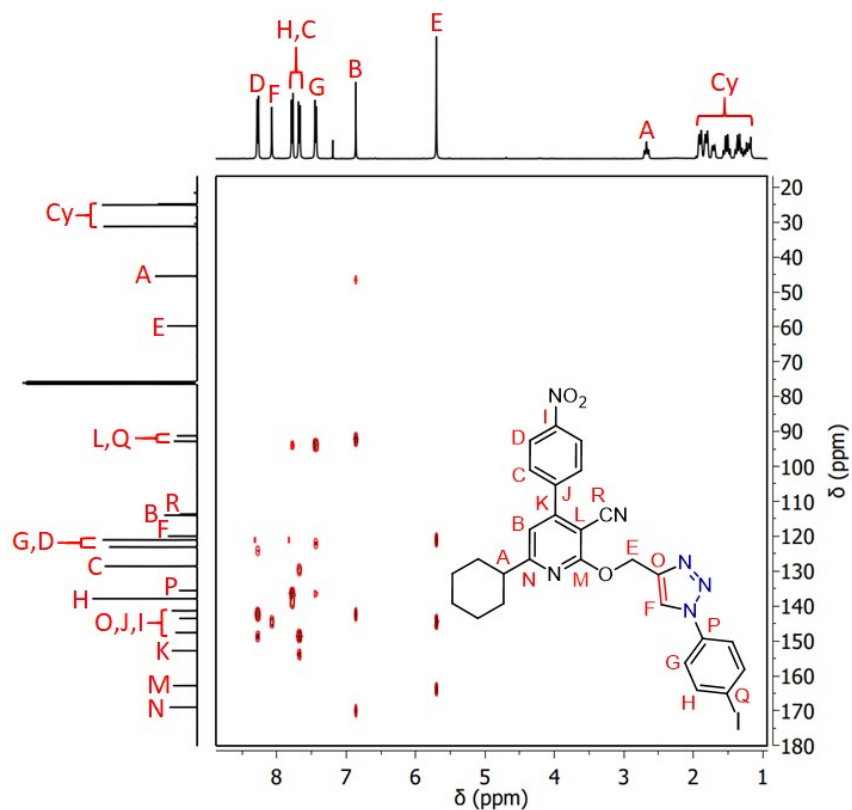

Figure S35. 2D HMBC spectrum of compound **19** (400 MHz, CDCl<sub>3</sub>, 25 °C).

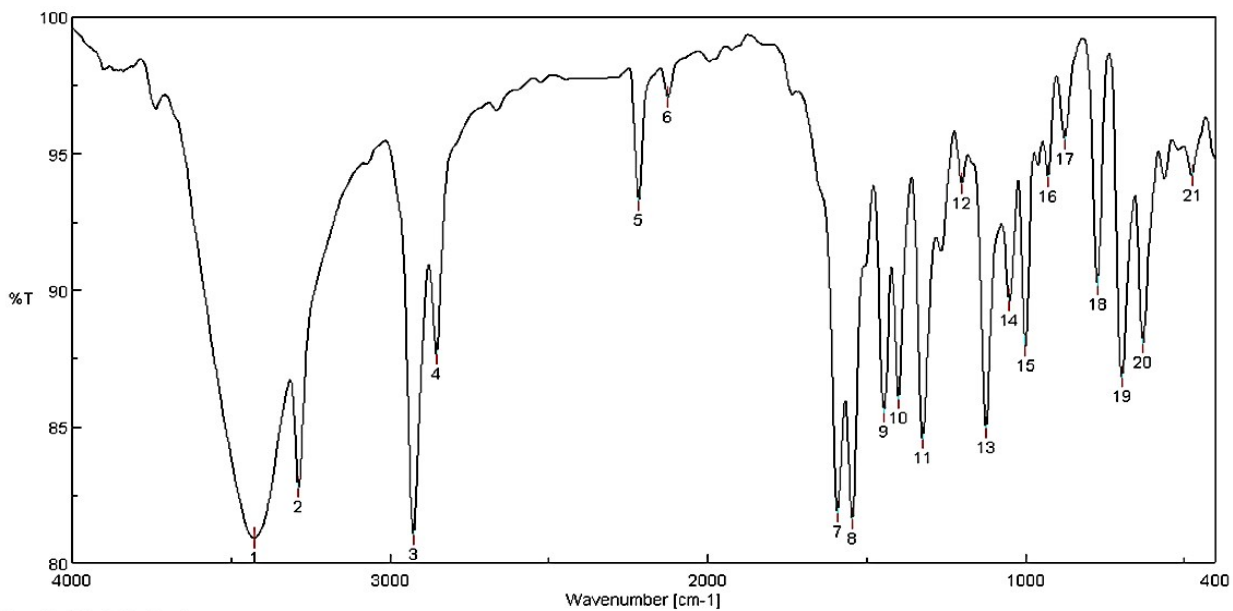

[ Result of Peak Picking ]

| No. | Position | Intensity |
|-----|----------|-----------|-----|----------|-----------|-----|----------|-----------|-----|----------|-----------|
| 1   | 3427.85  | 80.93296  | 2   | 3287.07  | 82.76914  | 3   | 2926.45  | 81.05722  | 4   | 2854.13  | 87.66630  |
| 5   | 2217.74  | 93.28491  | 6   | 2125.17  | 97.08290  | 7   | 1591.95  | 81.87131  | 8   | 1544.7   | 81.62906  |
| 9   | 1445.39  | 85.52872  | 10  | 1400.07  | 86.03419  | 11  | 1323.89  | 64.56620  | 12  | 1200.47  | 93.91700  |
| 13  | 1124.3   | 84.95769  | 14  | 1050.05  | 89.63757  | 15  | 999.91   | 87.96706  | 16  | 929.521  | 94.16153  |
| 17  | 875.524  | 95.54895  | 18  | 773.315  | 90.19632  | 19  | 696.177  | 86.82561  | 20  | 630.609  | 88.06243  |
| 21  | 475.367  | 94.21258  |     |          |           |     |          |           |     |          |           |

Figure S36. FT-IR spectrum of compound **3**.

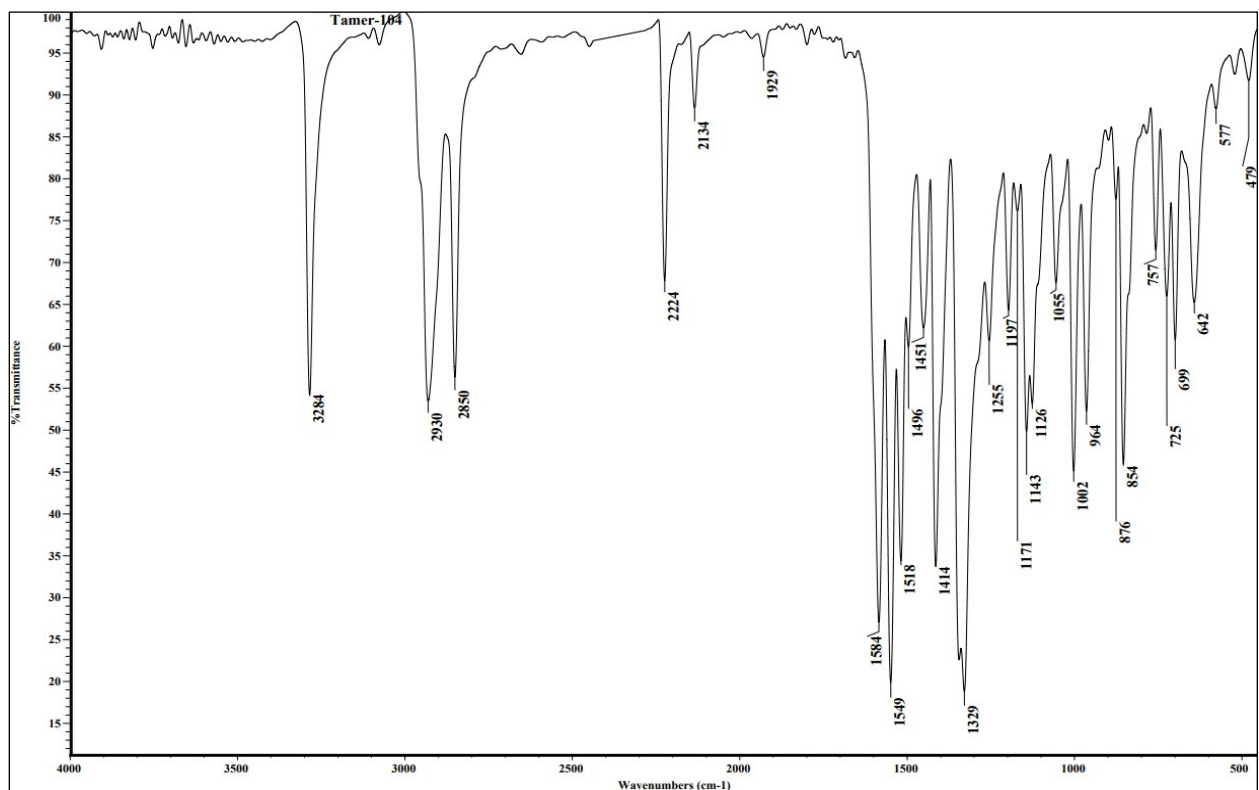

Figure S37. FT-IR spectrum of compound 4.

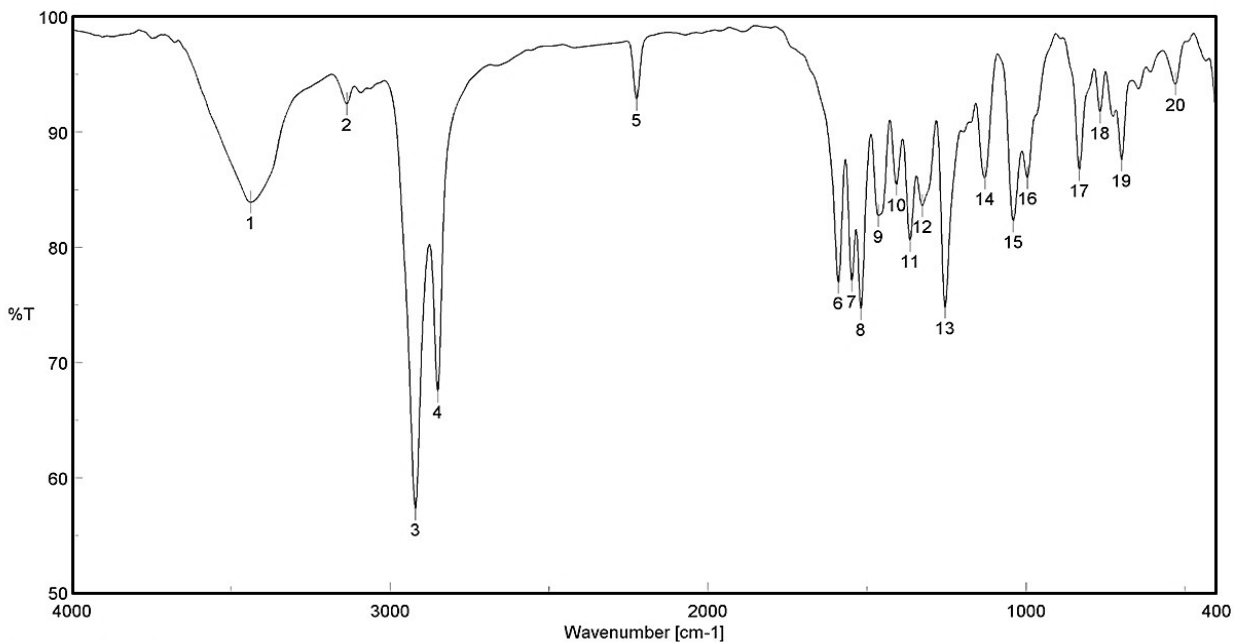

[ Result of Peak Picking ]

| No. | Position | Intensity |
|-----|----------|-----------|-----|----------|-----------|-----|----------|-----------|-----|----------|-----------|
| 1   | 3438.46  | 83.89680  | 2   | 3135.69  | 92.41866  | 3   | 2919.7   | 57.26437  | 4   | 2849.31  | 67.48486  |
| 5   | 2224.49  | 92.82957  | 6   | 1590.02  | 76.92682  | 7   | 1547.59  | 77.08612  | 8   | 1518.67  | 74.63217  |
| 9   | 1463.71  | 82.71739  | 10  | 1406.82  | 85.43319  | 11  | 1364.39  | 80.57937  | 12  | 1325.82  | 83.59454  |
| 13  | 1254.47  | 74.76842  | 14  | 1129.12  | 85.99150  | 15  | 1039.44  | 82.26630  | 16  | 995.089  | 86.00856  |
| 17  | 832.133  | 86.72309  | 18  | 766.566  | 91.72246  | 19  | 699.069  | 87.58270  | 20  | 529.364  | 94.14059  |

Figure S38. FT-IR spectrum of compound 11.

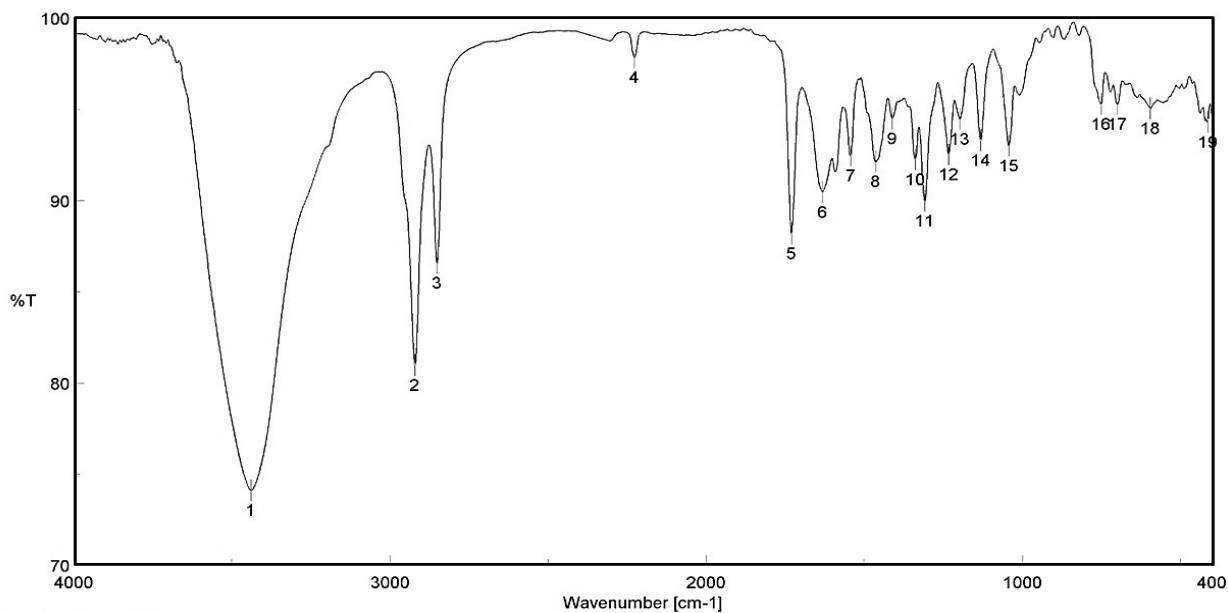

[ Result of Peak Picking ]

| No. | Position | Intensity |
|-----|----------|-----------|-----|----------|-----------|-----|----------|-----------|-----|----------|-----------|
| 1   | 3439.42  | 74.10635  | 2   | 2920.66  | 80.97165  | 3   | 2851.24  | 86.56443  | 4   | 2226.42  | 97.84769  |
| 5   | 1729.83  | 88.19122  | 6   | 1631.48  | 90.46043  | 7   | 1542.77  | 92.45591  | 8   | 1463.71  | 92.12446  |
| 9   | 1411.64  | 94.48469  | 10  | 1338.36  | 92.25015  | 11  | 1308.46  | 89.97881  | 12  | 1233.25  | 92.51637  |
| 13  | 1197.58  | 94.46706  | 14  | 1131.05  | 93.29150  | 15  | 1042.34  | 92.99705  | 16  | 750.174  | 95.27834  |
| 17  | 699.069  | 95.28536  | 18  | 594.932  | 95.04222  | 19  | 413.656  | 94.28137  |     |          |           |

Figure S39. FT-IR spectrum of compound 12.

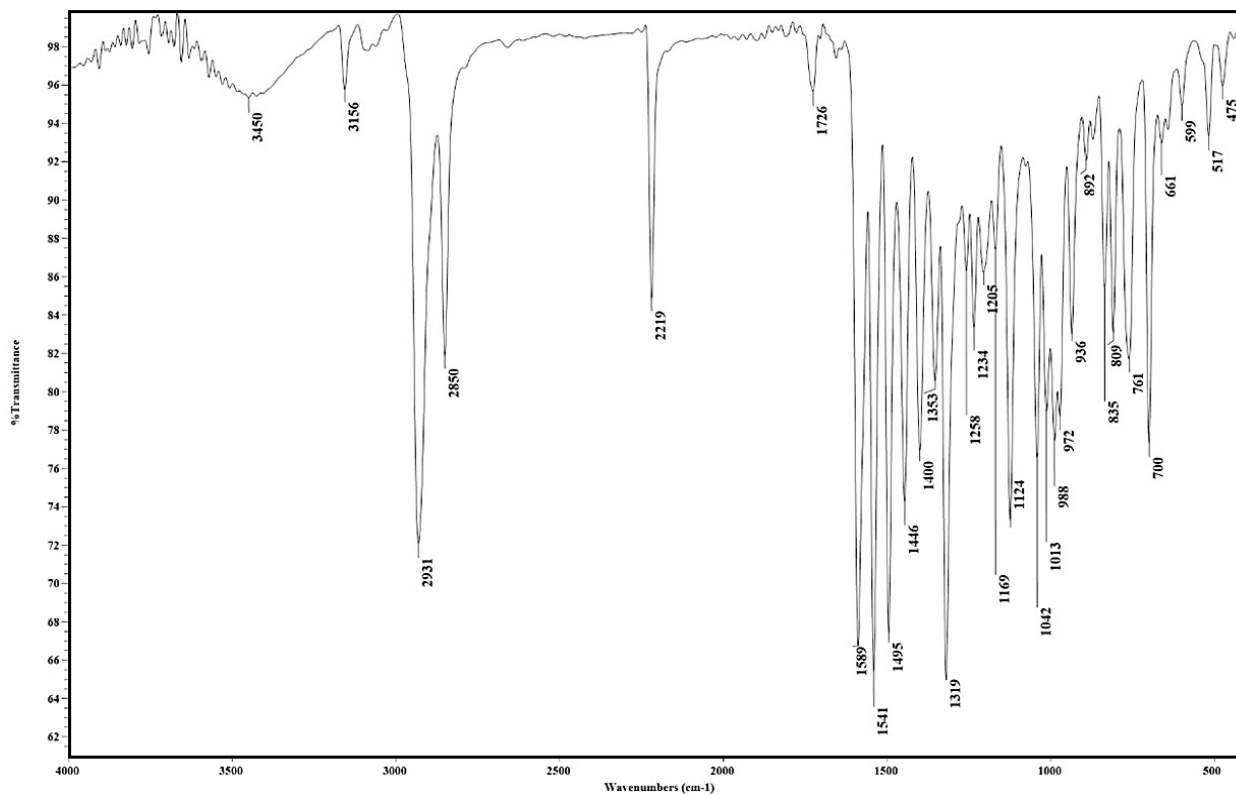

Figure S40. FT-IR spectrum of compound 13.

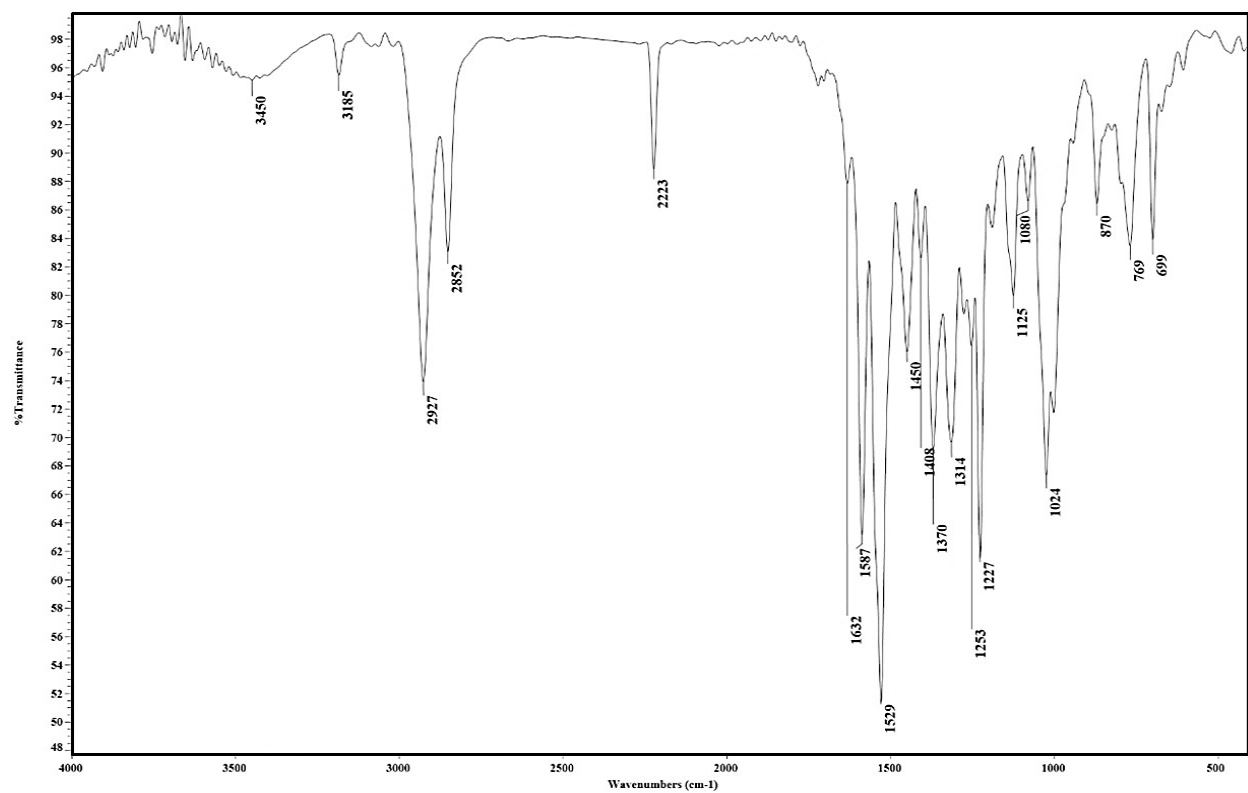

Figure S41. FT-IR spectrum of compound 14.

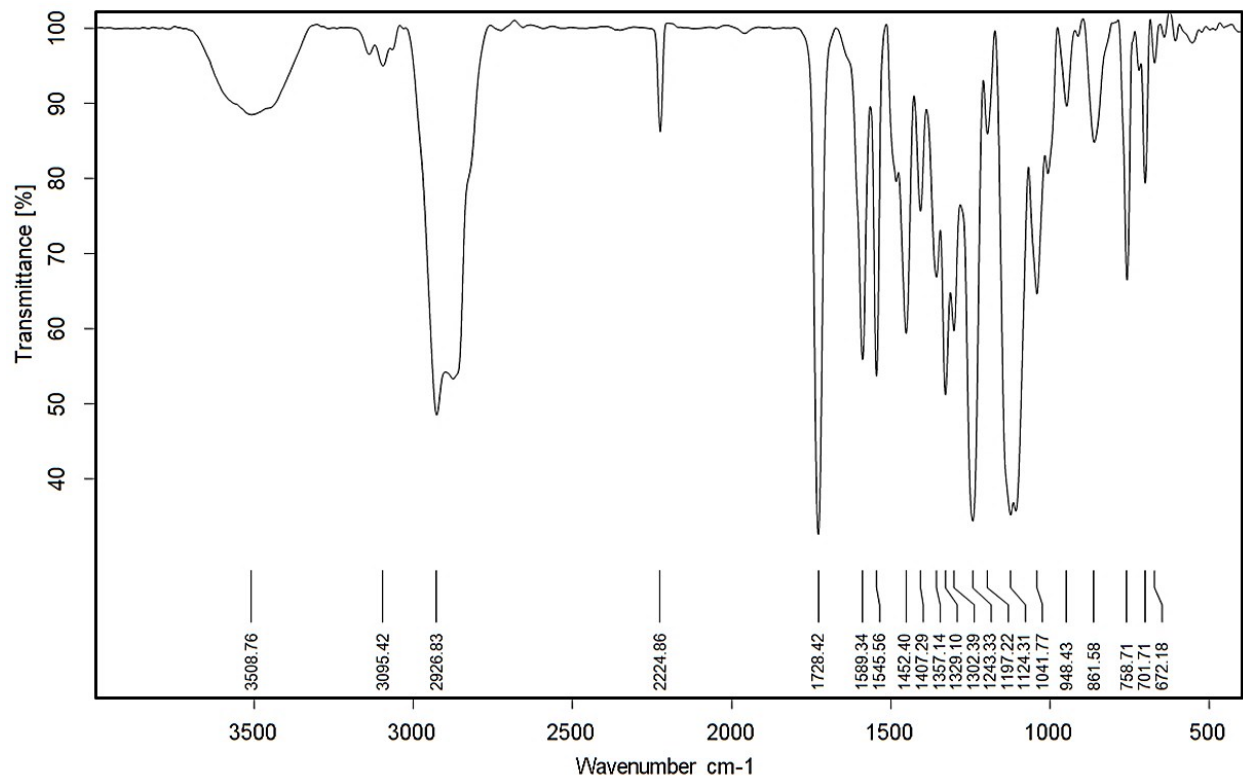

Figure S42. FT-IR spectrum of compound 15.



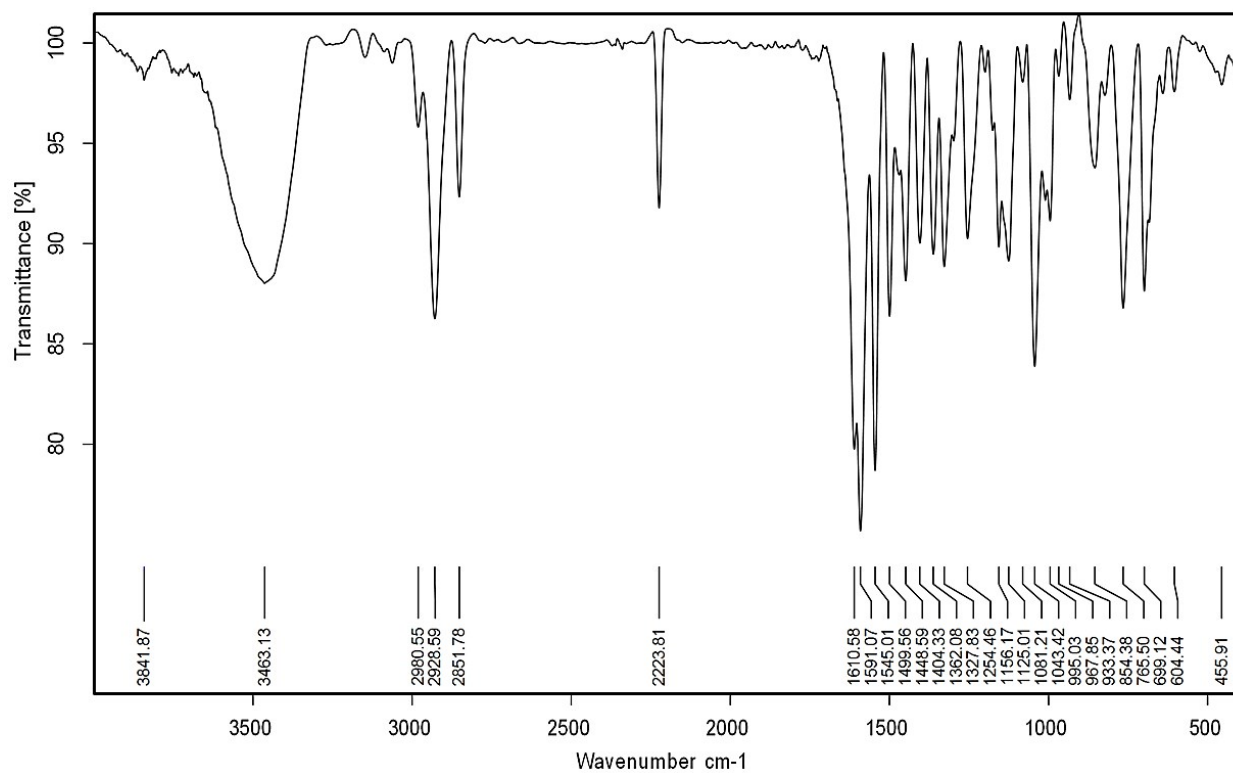

Figure S43. FT-IR spectrum of compound 16.

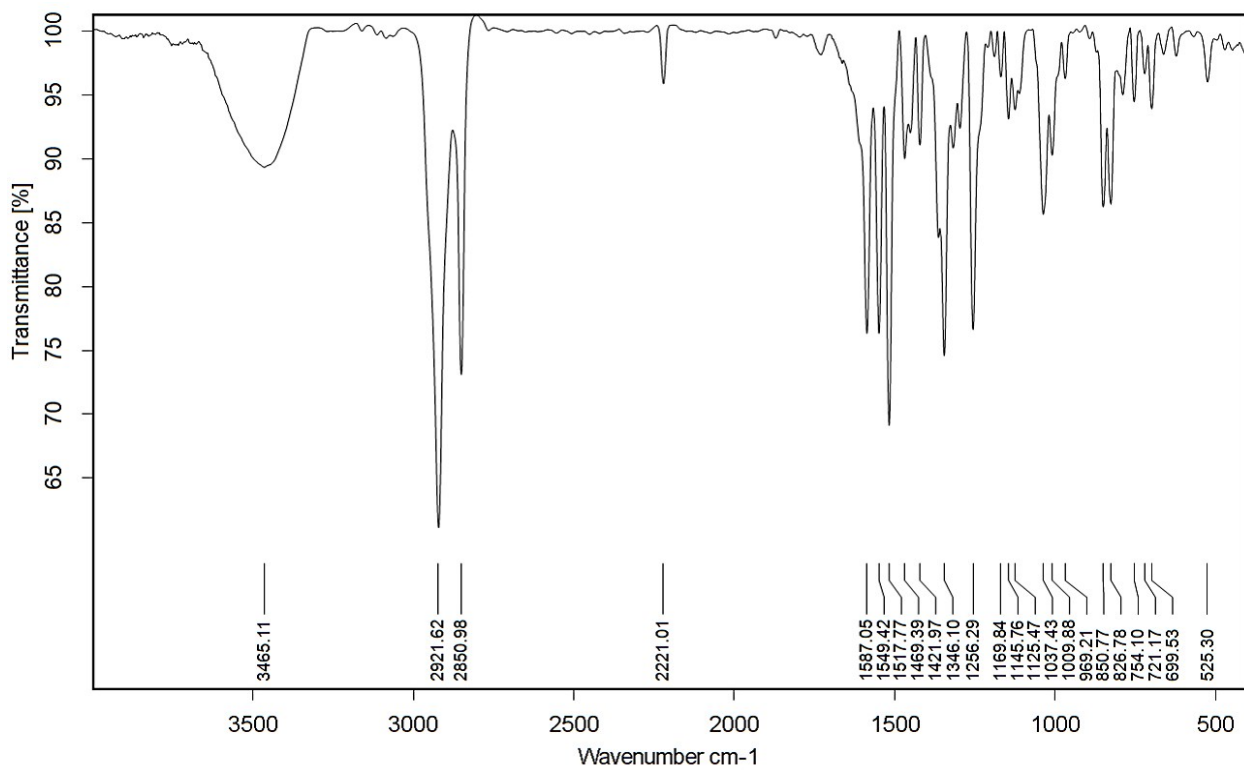

Figure S44. FT-IR spectrum of compound 17.

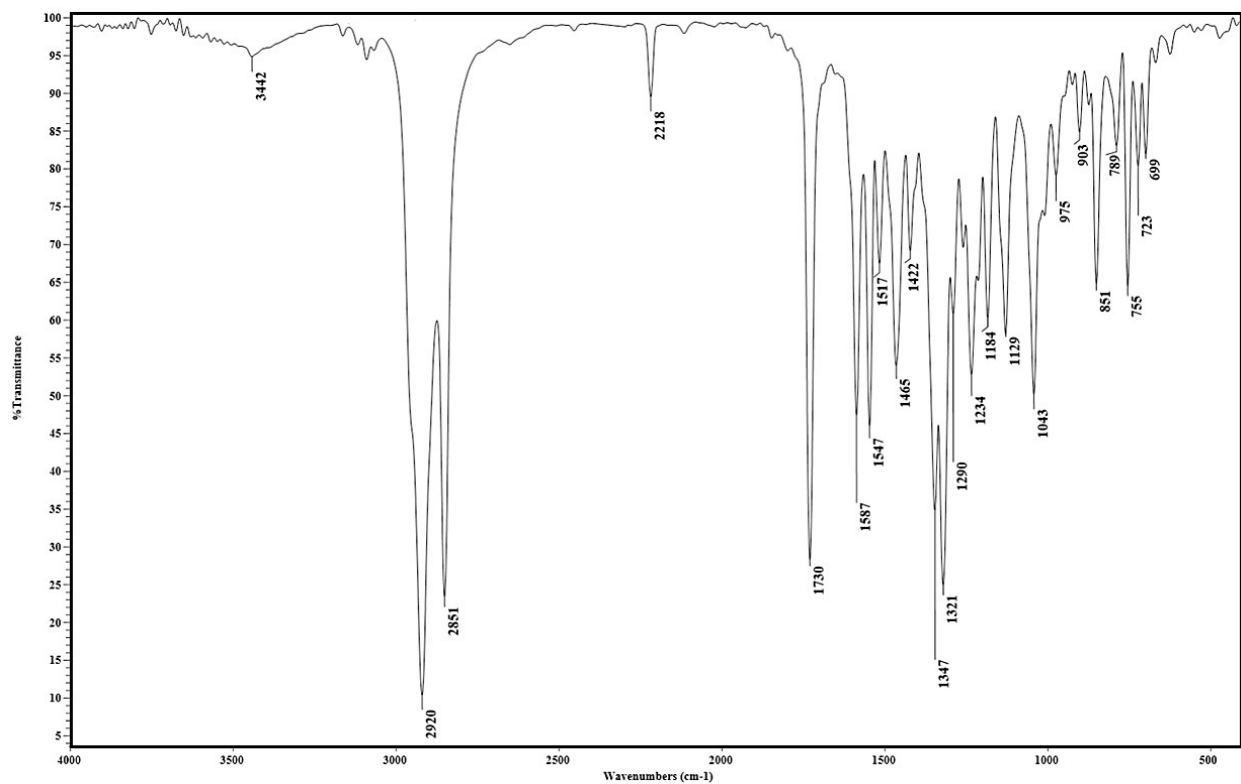

Figure S45. FT-IR spectrum of compound 18.

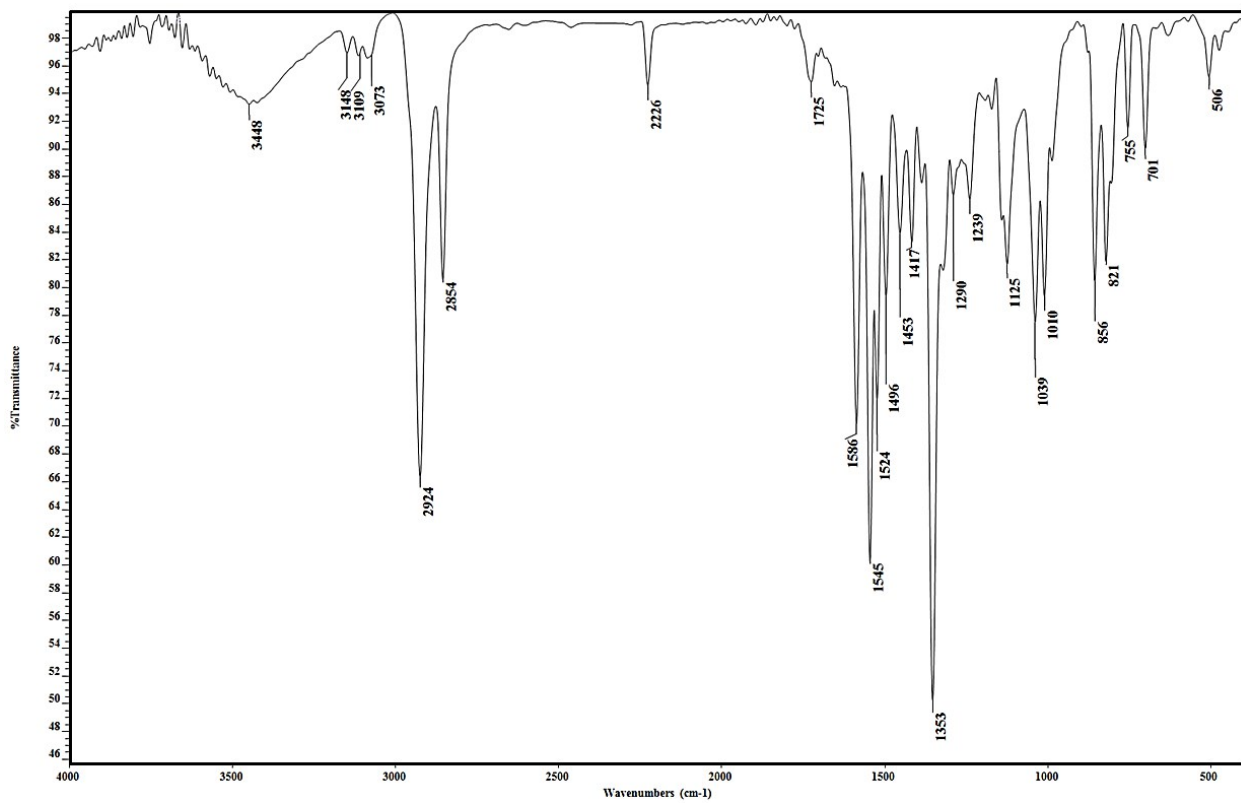

Figure S46. FT-IR spectrum of compound 19.

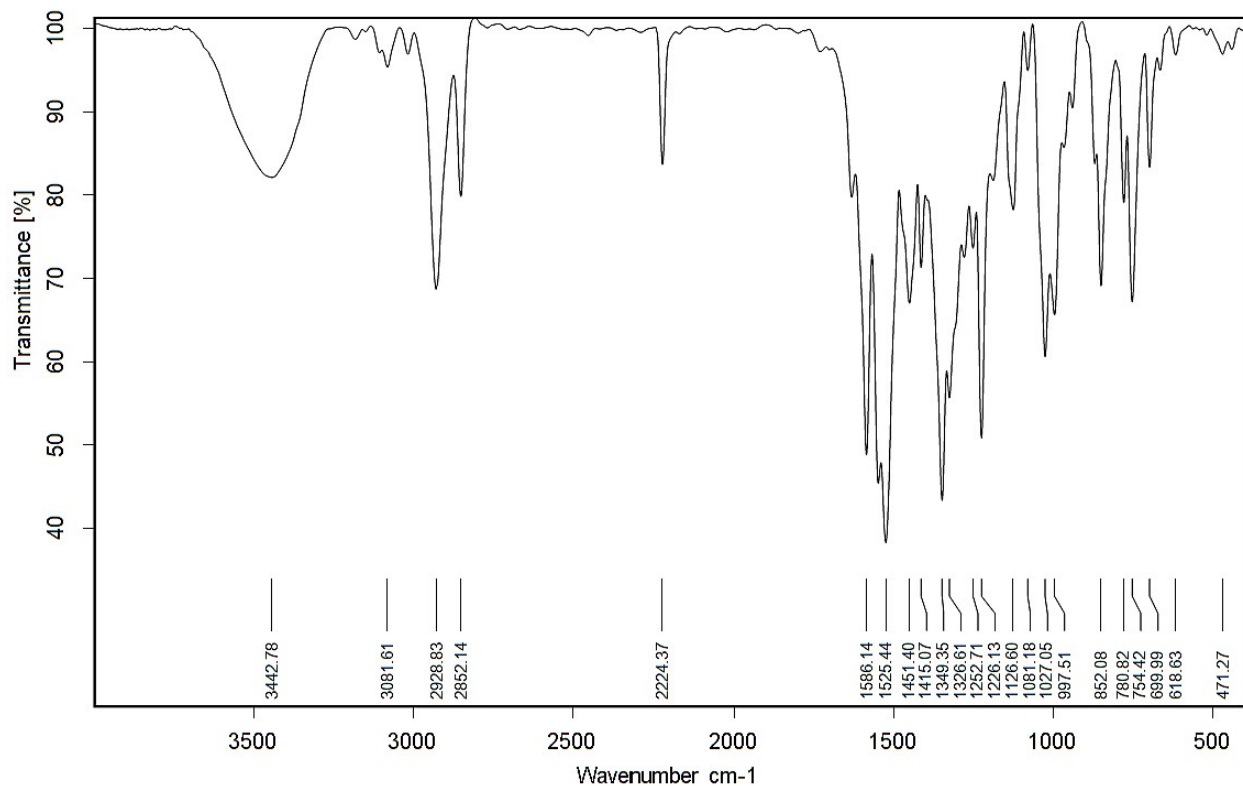

Figure S47. FT-IR spectrum of compound 20.

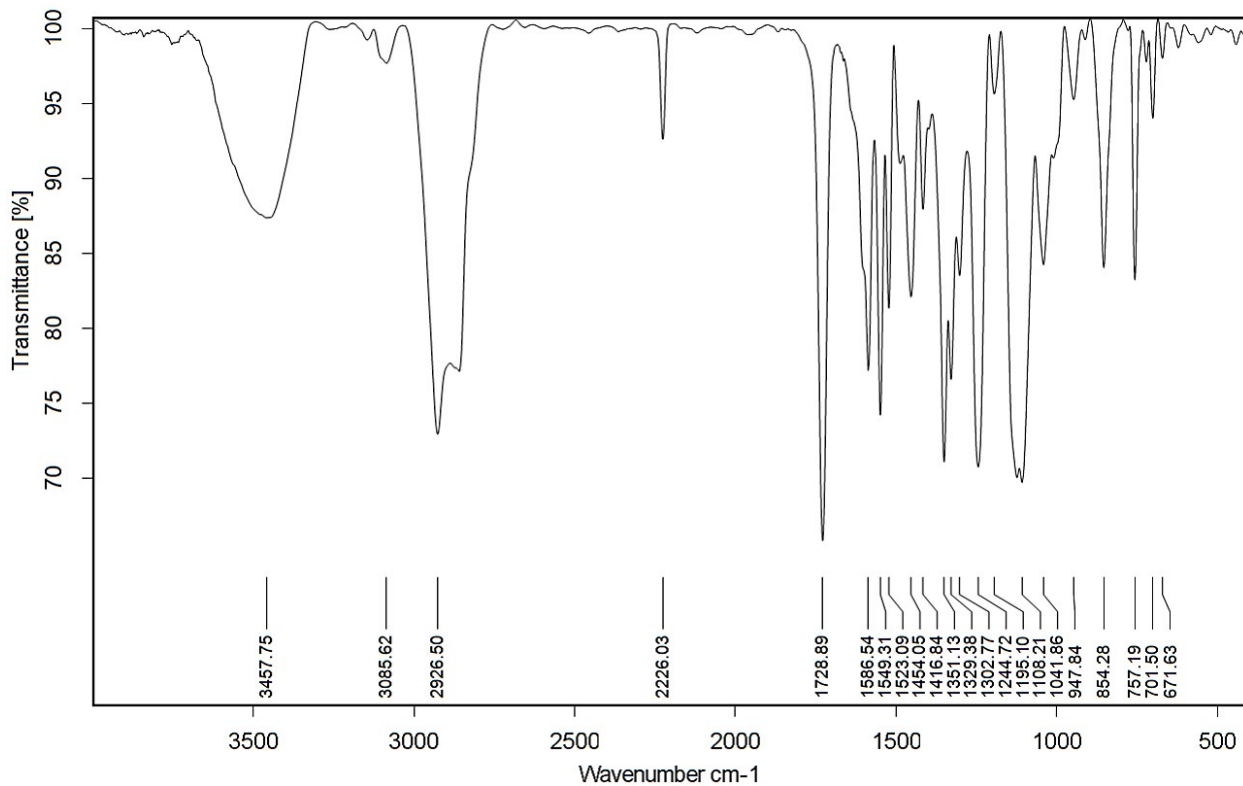

Figure S48. FT-IR spectrum of compound 21.

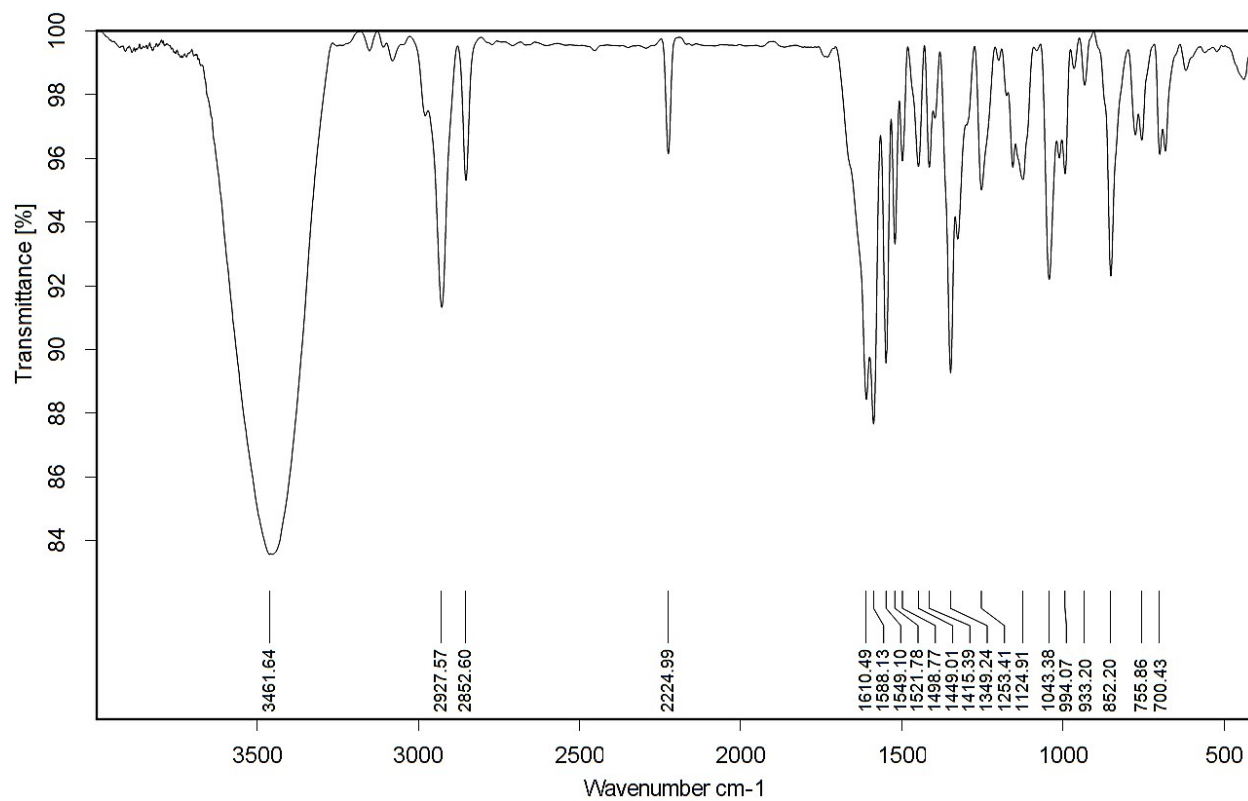

**Figure S49.** FT-IR spectrum of compound **22**.

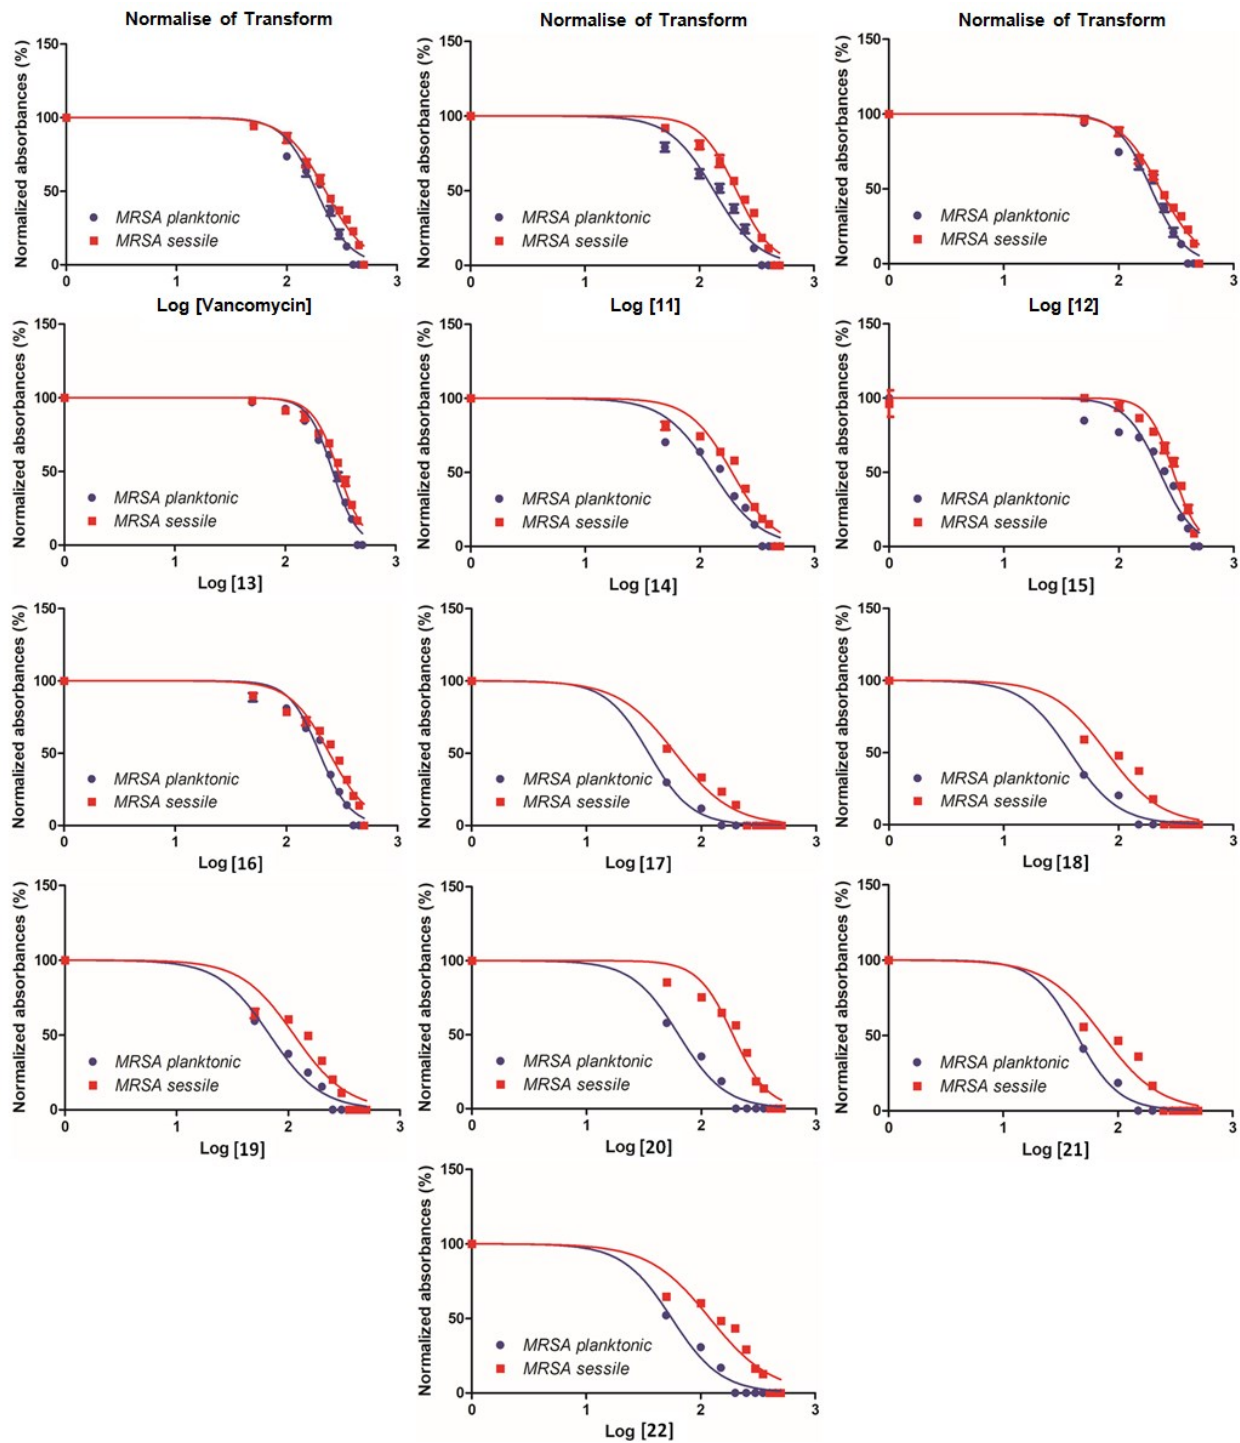

Figure S50. Normalised absorbance (%) of compounds 11-22 against planktonic and sessile MRSA.

**Table S1.** 2D NMR correlations measured for compound **4**

| Spectra                              | Correlations                                                                                                                                                                                                                                                                                                                                                                                                                                                                                                                                                                                                                                                             |
|--------------------------------------|--------------------------------------------------------------------------------------------------------------------------------------------------------------------------------------------------------------------------------------------------------------------------------------------------------------------------------------------------------------------------------------------------------------------------------------------------------------------------------------------------------------------------------------------------------------------------------------------------------------------------------------------------------------------------|
| <sup>1</sup> H- <sup>1</sup> H NOESY | H <sup>A</sup> -H <sup>B</sup> , H <sup>C</sup> -H <sup>D</sup> , H <sup>D</sup> -H <sup>E</sup> , H <sup>E</sup> -H <sup>F</sup>                                                                                                                                                                                                                                                                                                                                                                                                                                                                                                                                        |
| <sup>1</sup> H- <sup>1</sup> H COSY  | H <sup>E</sup> -H <sup>F</sup>                                                                                                                                                                                                                                                                                                                                                                                                                                                                                                                                                                                                                                           |
| HMBC                                 | H <sup>B</sup> -C <sup>A</sup> ( <sup>3</sup> J), H <sup>B</sup> -C <sup>N</sup> ( <sup>2</sup> J), H <sup>B</sup> -C <sup>K</sup> ( <sup>3</sup> J), H <sup>D</sup> -C <sup>C</sup> ( <sup>3</sup> J), H <sup>D</sup> -C <sup>J</sup> ( <sup>3</sup> J), H <sup>D</sup> -C <sup>H</sup> ( <sup>3</sup> J), H <sup>D</sup> -C <sup>I</sup> ( <sup>2</sup> J), H <sup>D</sup> -C <sup>L</sup> ( <sup>2</sup> J), H <sup>E</sup> -C <sup>F</sup> ( <sup>2</sup> J), H <sup>E</sup> -C <sup>G</sup> ( <sup>3</sup> J), H <sup>E</sup> -C <sup>I</sup> ( <sup>3</sup> J), H <sup>F</sup> -C <sup>H</sup> ( <sup>3</sup> J), H <sup>F</sup> -C <sup>G</sup> ( <sup>2</sup> J) |
| HSQC                                 | H <sup>C</sup> -C <sup>C</sup> , H <sup>B</sup> -C <sup>B</sup> , H <sup>D</sup> -C <sup>D</sup> , H <sup>E</sup> -C <sup>E</sup> , H <sup>F</sup> -C <sup>F</sup>                                                                                                                                                                                                                                                                                                                                                                                                                                                                                                       |

**Table S2.** 2D NMR correlations measured for compound **19**

| Spectra                              | Correlations                                                                                                                                                                                                                                                                                                                                                                                                                                                                                                                                                                                                                                                                                                                                                                                                                   |
|--------------------------------------|--------------------------------------------------------------------------------------------------------------------------------------------------------------------------------------------------------------------------------------------------------------------------------------------------------------------------------------------------------------------------------------------------------------------------------------------------------------------------------------------------------------------------------------------------------------------------------------------------------------------------------------------------------------------------------------------------------------------------------------------------------------------------------------------------------------------------------|
| <sup>1</sup> H- <sup>1</sup> H NOESY | H <sup>A</sup> -H <sup>B</sup> , H <sup>B</sup> -H <sup>C</sup> , H <sup>C</sup> -H <sup>D</sup> , H <sup>F</sup> -H <sup>G</sup> , H <sup>G</sup> -H <sup>H</sup>                                                                                                                                                                                                                                                                                                                                                                                                                                                                                                                                                                                                                                                             |
| <sup>1</sup> H- <sup>1</sup> H COSY  | H <sup>C</sup> -H <sup>D</sup> , H <sup>G</sup> -H <sup>H</sup>                                                                                                                                                                                                                                                                                                                                                                                                                                                                                                                                                                                                                                                                                                                                                                |
| HMBC                                 | H <sup>E</sup> -C <sup>F</sup> ( <sup>3</sup> J), H <sup>E</sup> -C <sup>O</sup> ( <sup>2</sup> J), H <sup>E</sup> -C <sup>M</sup> ( <sup>3</sup> J), H <sup>B</sup> -C <sup>A</sup> ( <sup>3</sup> J), H <sup>B</sup> -C <sup>L</sup> ( <sup>3</sup> J), H <sup>B</sup> -C <sup>J</sup> ( <sup>3</sup> J), H <sup>B</sup> -C <sup>N</sup> ( <sup>2</sup> J), H <sup>G</sup> -C <sup>Q</sup> ( <sup>3</sup> J), H <sup>G</sup> -C <sup>H</sup> ( <sup>2</sup> J), H <sup>C</sup> -C <sup>I</sup> ( <sup>3</sup> J), H <sup>C</sup> -C <sup>K</sup> ( <sup>3</sup> J), H <sup>H</sup> -C <sup>Q</sup> ( <sup>2</sup> J), H <sup>H</sup> -C <sup>P</sup> ( <sup>3</sup> J), H <sup>F</sup> -C <sup>O</sup> ( <sup>2</sup> J), H <sup>D</sup> -C <sup>J</sup> ( <sup>3</sup> J), H <sup>D</sup> -C <sup>I</sup> ( <sup>2</sup> J) |
| HSQC                                 | H <sup>A</sup> -C <sup>A</sup> , H <sup>E</sup> -C <sup>E</sup> , H <sup>B</sup> -C <sup>B</sup> , H <sup>G</sup> -C <sup>G</sup> , H <sup>C</sup> -C <sup>C</sup> , H <sup>H</sup> -C <sup>H</sup> , H <sup>F</sup> -C <sup>F</sup> , H <sup>D</sup> -C <sup>D</sup>                                                                                                                                                                                                                                                                                                                                                                                                                                                                                                                                                          |

**Table S3.** Microtox effective concentration levels of toxicity

| EC <sub>50</sub> % degree | Toxicity level   |
|---------------------------|------------------|
| 0-19                      | Extremely toxic  |
| 20-39                     | Very toxic       |
| 40-59                     | Toxic            |
| 60-79                     | Moderately toxic |
| 80-99                     | Light toxic      |
| ≥100                      | Nontoxic         |
